# Supplementary material for: Probing the nature of donor–acceptor effects in conjugated materials: a joint experimental and computational study of model conjugated oligomers
Source: Royal Society of Chemistry journal article supplement (doi:10.1039/d1cp04603a), 2021-01-01
Supplement: d1cp04603a1.pdf [file d1cp04603a1.pdf]

## SUPPORTING INFORMATION

### Probing the Nature of Donor-Acceptor Effects in Conjugated Materials: A Joint Experimental and Computational Study of Model Conjugated Oligomers

Trent E. Anderson,<sup>a</sup> Evan W. Culver,<sup>a</sup> Irene Badía-Domínguez,<sup>b</sup> Wyatt D. Wilcox,<sup>a</sup> Claire E. Buysse,<sup>a</sup>  
M. Carmen Ruiz Delgado,<sup>b</sup> and Seth C. Rasmussen\*<sup>a</sup>

<sup>a</sup>Department of Chemistry and Biochemistry, North Dakota State University, NDSU Dept. 2735, P.O. Box 6050, Fargo, ND 58108-6050, USA. Fax: 1-701-231-8747; Tel: 1-701-231-8831; E-mail: [seth.rasmussen@ndsu.edu](mailto:seth.rasmussen@ndsu.edu)

<sup>b</sup>Department of Physical Chemistry, University of Málaga, Campus de Teatinos s/n, Málaga 29071, Spain. E-mail: [carmenrd@uma.es](mailto:carmenrd@uma.es)

#### Table of Contents:

|                                                                                                                                                                                                                                                                   |     |
|-------------------------------------------------------------------------------------------------------------------------------------------------------------------------------------------------------------------------------------------------------------------|-----|
| I. <b>Figure S1.</b> <sup>1</sup> H NMR spectrum of <b>1</b> .....                                                                                                                                                                                                | S2  |
| II. <b>Figure S2.</b> <sup>13</sup> C NMR spectrum of <b>1</b> .....                                                                                                                                                                                              | S2  |
| III. <b>Figure S3.</b> <sup>1</sup> H NMR spectrum of <b>BTD-BTD</b> .....                                                                                                                                                                                        | S3  |
| IV. <b>Figure S4.</b> <sup>13</sup> C NMR spectrum of <b>BTD-BTD</b> .....                                                                                                                                                                                        | S3  |
| V. <b>Figure S5.</b> <sup>1</sup> H NMR spectrum of <b>EDOT-EDOT</b> .....                                                                                                                                                                                        | S4  |
| VI. <b>Figure S6.</b> <sup>13</sup> C NMR spectrum of <b>EDOT-EDOT</b> .....                                                                                                                                                                                      | S4  |
| VII. <b>Figure S7.</b> <sup>1</sup> H NMR spectrum of <b>EDOT-BTD</b> .....                                                                                                                                                                                       | S5  |
| VIII. <b>Figure S8.</b> <sup>13</sup> C NMR spectrum of <b>EDOT-BTD</b> .....                                                                                                                                                                                     | S5  |
| IX. <b>Figure S9.</b> <sup>1</sup> H NMR spectrum of <b>4</b> .....                                                                                                                                                                                               | S6  |
| X. <b>Figure S10.</b> <sup>13</sup> C NMR spectrum of <b>4</b> .....                                                                                                                                                                                              | S6  |
| XI. <b>Figure S11.</b> <sup>1</sup> H NMR spectrum of <b>EDOT-TP</b> .....                                                                                                                                                                                        | S7  |
| XII. <b>Figure S12.</b> <sup>13</sup> C NMR spectrum of <b>EDOT-TP</b> .....                                                                                                                                                                                      | S7  |
| XIII. <b>Figure S13.</b> <sup>1</sup> H NMR spectrum of <b>TP-BTD</b> .....                                                                                                                                                                                       | S8  |
| XIV. <b>Figure S14.</b> <sup>13</sup> C NMR spectrum of <b>TP-BTD</b> .....                                                                                                                                                                                       | S8  |
| XV. Modeling of 2nd order coupling effects in the EDOT-containing dimers.....                                                                                                                                                                                     | S9  |
| XVI. <b>Figure S15.</b> Comparison of results from modeling of 2nd order coupling effects in the <sup>1</sup> H NMR spectra of <b>EDOT-EDOT</b> , <b>EDOT-BTD</b> , and <b>EDOT-TP</b> .....                                                                      | S9  |
| XVII. X-ray Crystallography.....                                                                                                                                                                                                                                  | S10 |
| XVIII. <b>Table S1.</b> Crystallographic data for compounds <b>1</b> and <b>EDOT-BTD</b> .....                                                                                                                                                                    | S10 |
| XIX. <b>Figure S16.</b> Thermal ellipsoid plot (50% probability level) and unit cell of <b>1</b> .....                                                                                                                                                            | S11 |
| XX. <b>Figure S17.</b> Unit cell of <b>EDOT-BTD</b> (thermal ellipsoids at the 50% probability level).....                                                                                                                                                        | S11 |
| XXI. <b>Figure S18.</b> Solvatochromism in the emission spectra of <b>BTD-BTD</b> .....                                                                                                                                                                           | S12 |
| XXII. <b>Figure S19.</b> DFT-calculated interannular torsional angles.....                                                                                                                                                                                        | S12 |
| XXIII. <b>Table S2.</b> Comparison of the experimental (averaged X-Ray) and DFT-calculated geometric parameters of <b>EDOT-BTD</b> .....                                                                                                                          | S13 |
| XXIV. <b>Figure S20.</b> DFT-calculated interannular bond lengths.....                                                                                                                                                                                            | S13 |
| XXV. <b>Figure S21.</b> DFT-calculated intramolecular distances.....                                                                                                                                                                                              | S14 |
| XXVI. <b>Figure S22.</b> Electrostatic surface potentials (tuned ωB97/6-311G** level) for the dimer series of EDOT, TP and BTD units. Electrostatic potentials are scaled from negative (red) to positive (blue) values; green corresponds to neutral charge..... | S14 |
| XXVII. <b>Figure S23.</b> TD-DFT calculated absorption spectra.....                                                                                                                                                                                               | S15 |
| XXVIII. <b>Figure S24.</b> DFT-calculated frontier molecular orbital topologies (isovalue surface 0.03 a.u.).....                                                                                                                                                 | S16 |
| XXIX. <b>Table S3.</b> Tuned ω values (bohr <sup>-1</sup> ) for the symmetrical and asymmetrical dimers, at the ωB97/6-311G** level.....                                                                                                                          | S16 |

|        |                                                                                                                     |     |
|--------|---------------------------------------------------------------------------------------------------------------------|-----|
| XXX.   | Cartesian coordinates and energies of all calculated dimers at the B3LYP/6-311G** level.....                        | S17 |
| XXXI.  | Cartesian coordinates and energies of all calculated dimers at the optimally tuned $\omega$ B97/6-311G** level..... | S20 |
| XXXII. | References.....                                                                                                     | S24 |

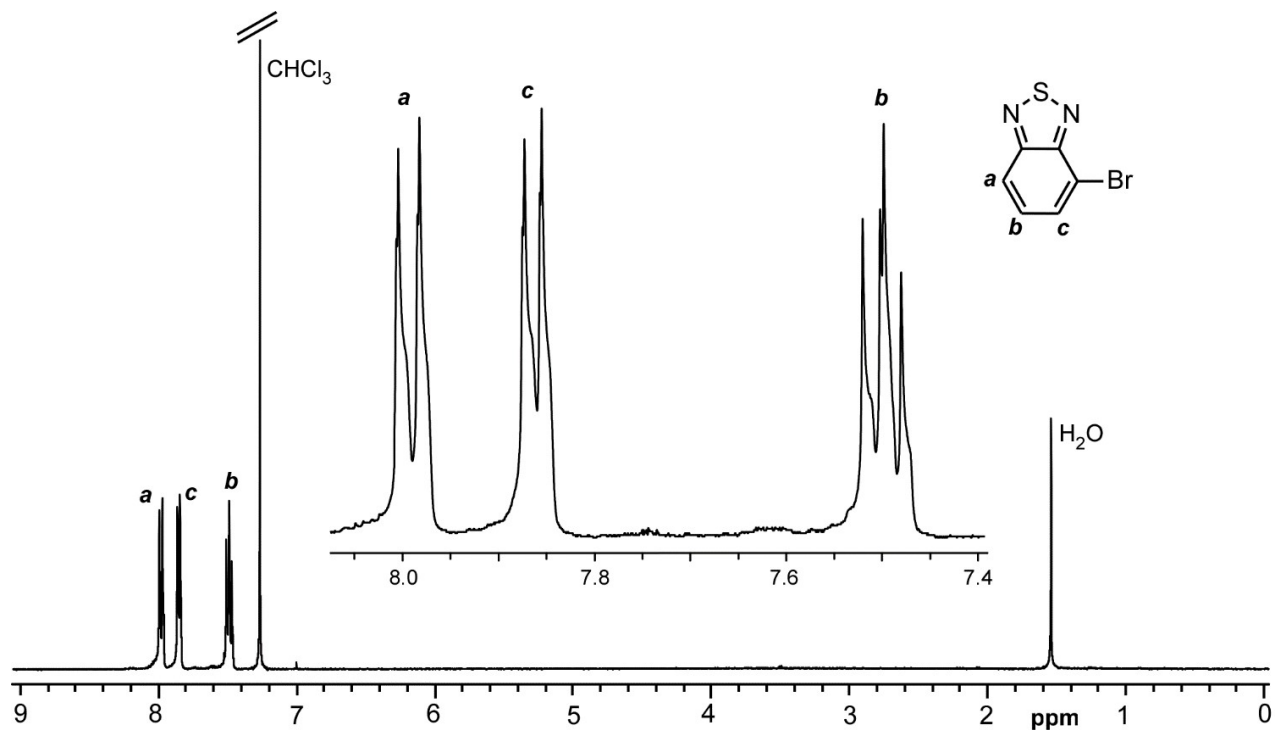

Figure S1. <sup>1</sup>H NMR spectrum of 1

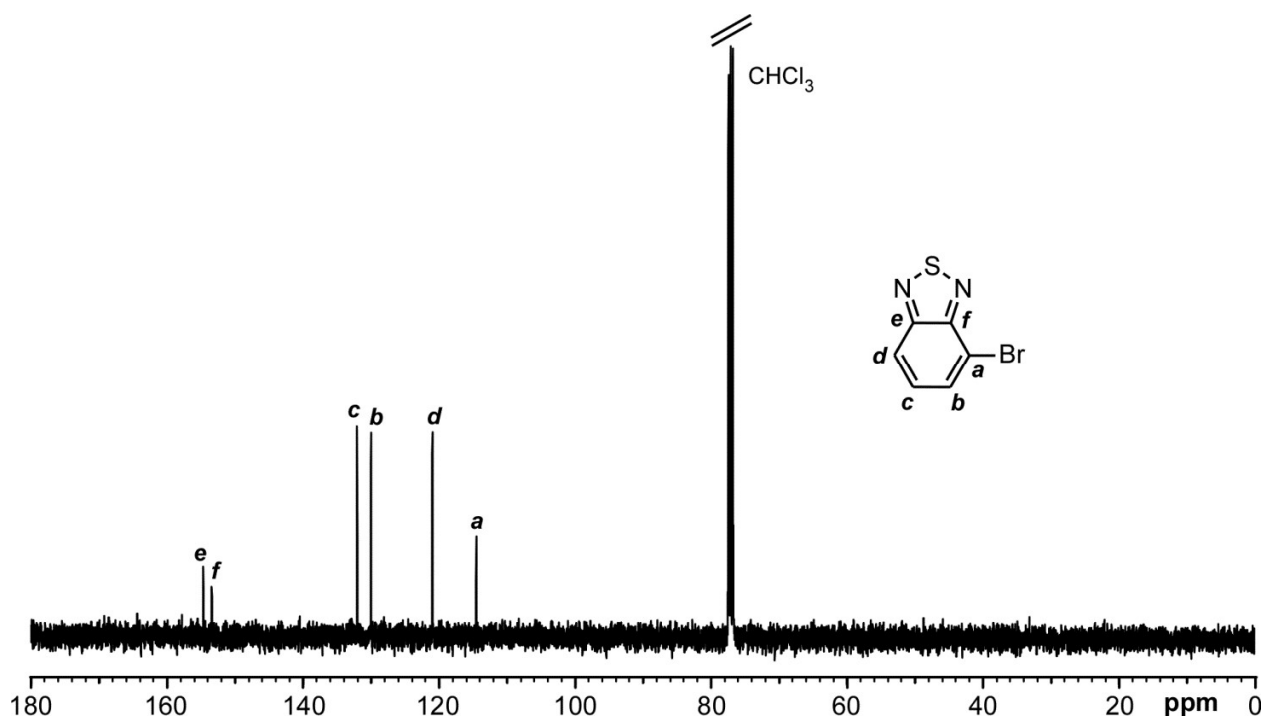

Figure S2. <sup>13</sup>C NMR spectrum of 1

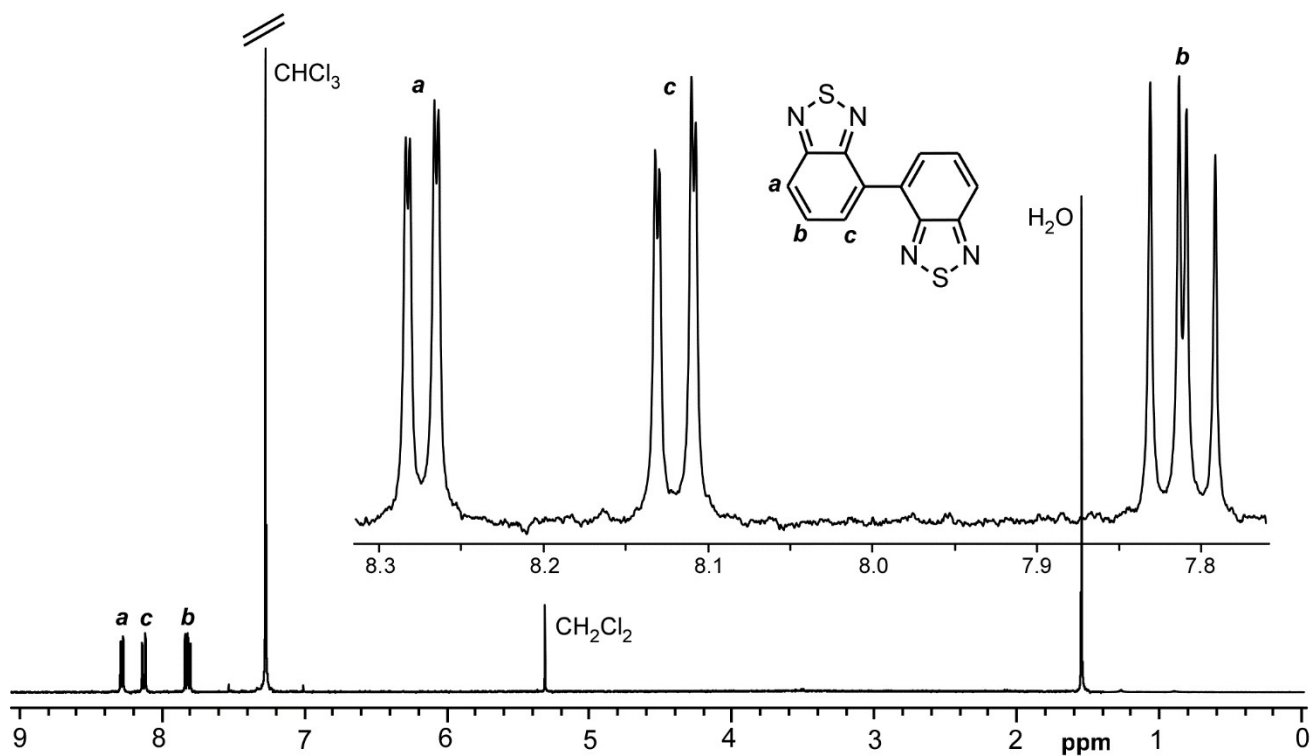

Figure S3. <sup>1</sup>H NMR spectrum of BTD-BTD

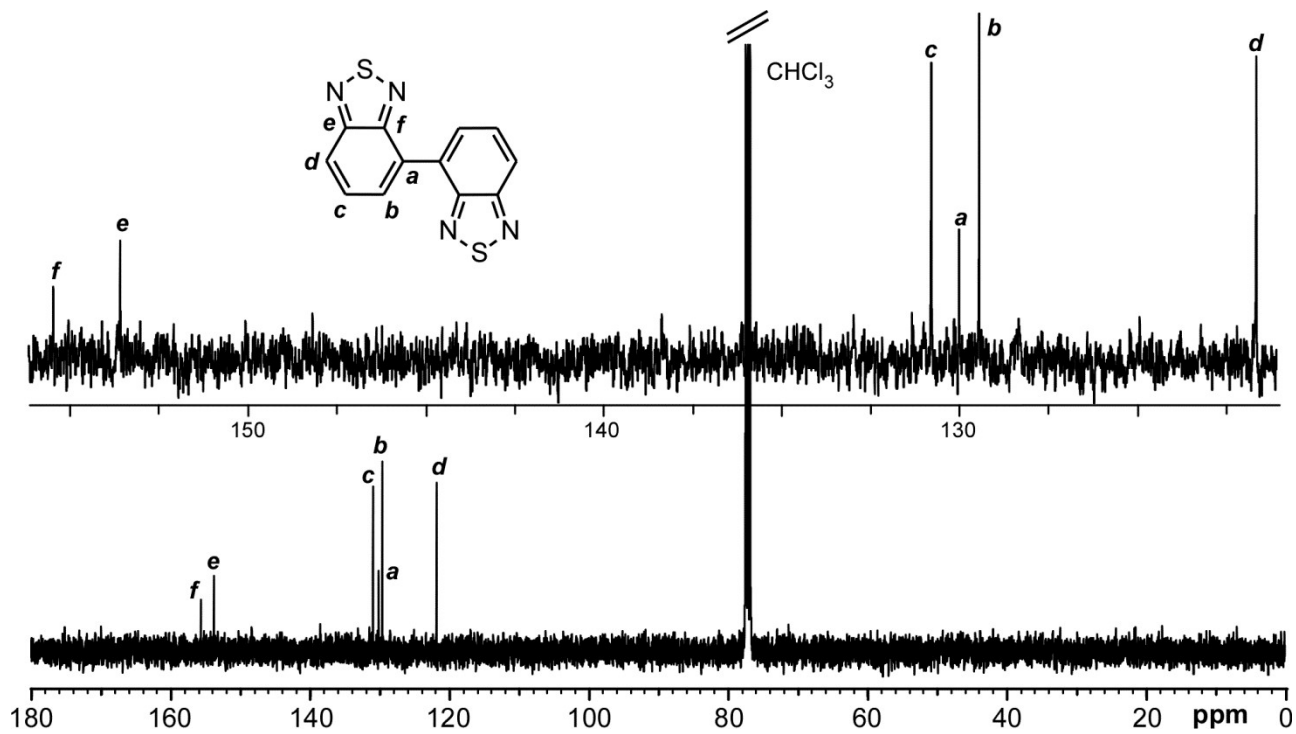

Figure S4. <sup>13</sup>C NMR spectrum of BTD-BTD

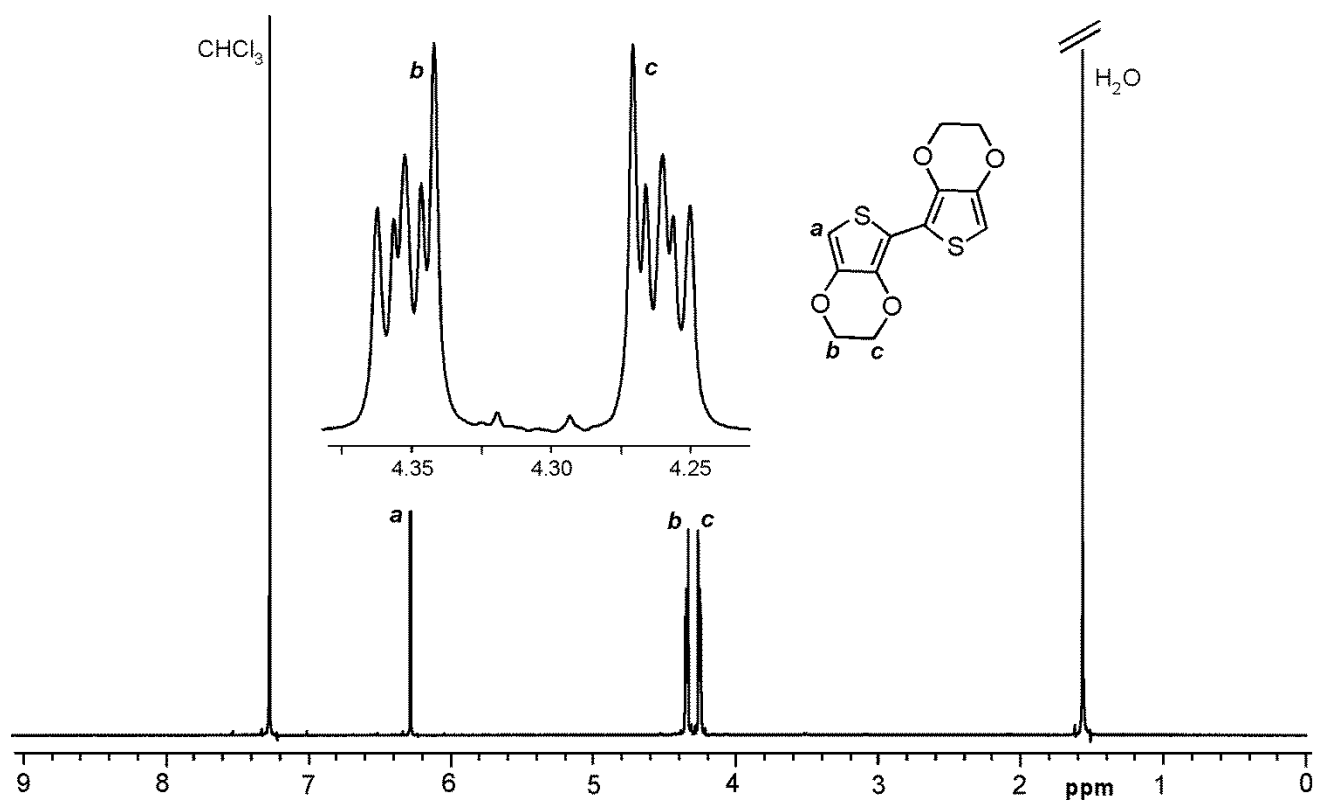

Figure S5.  $^1\text{H}$  NMR spectrum of EDOT-EDOT

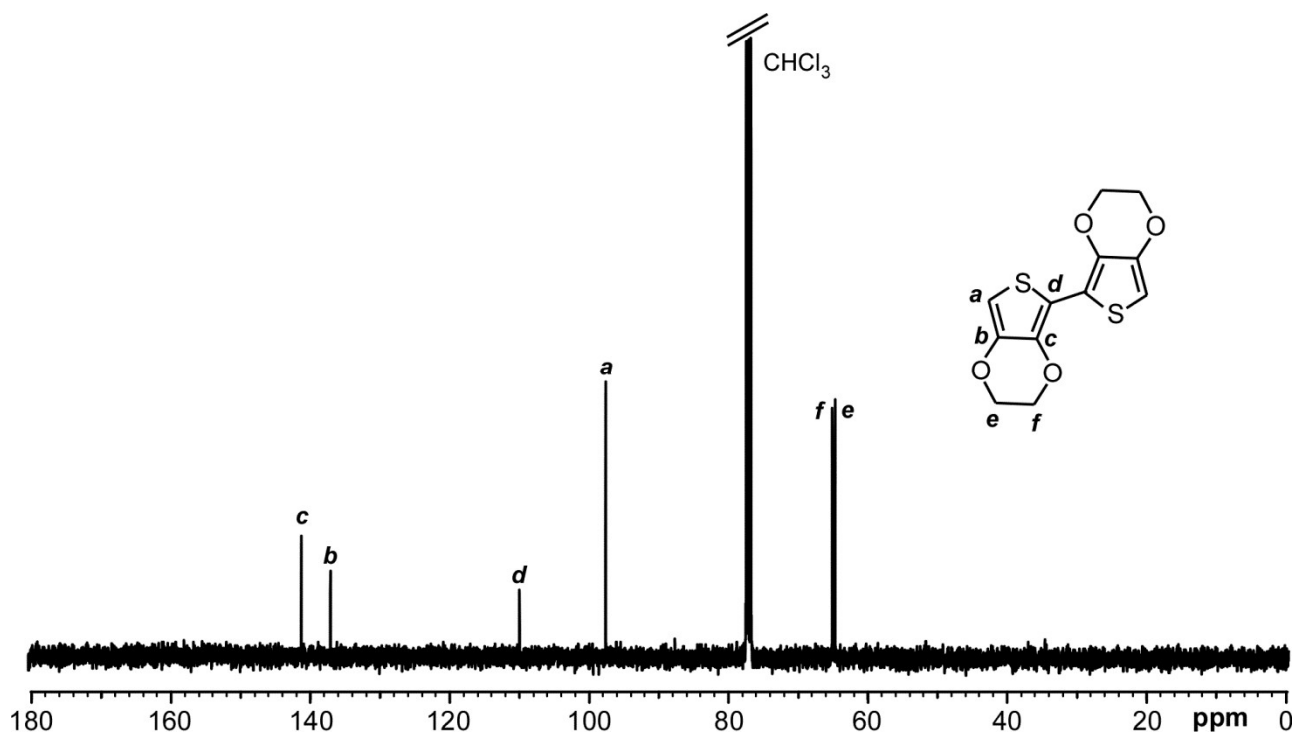

Figure S6.  $^{13}\text{C}$  NMR spectrum of EDOT-EDOT

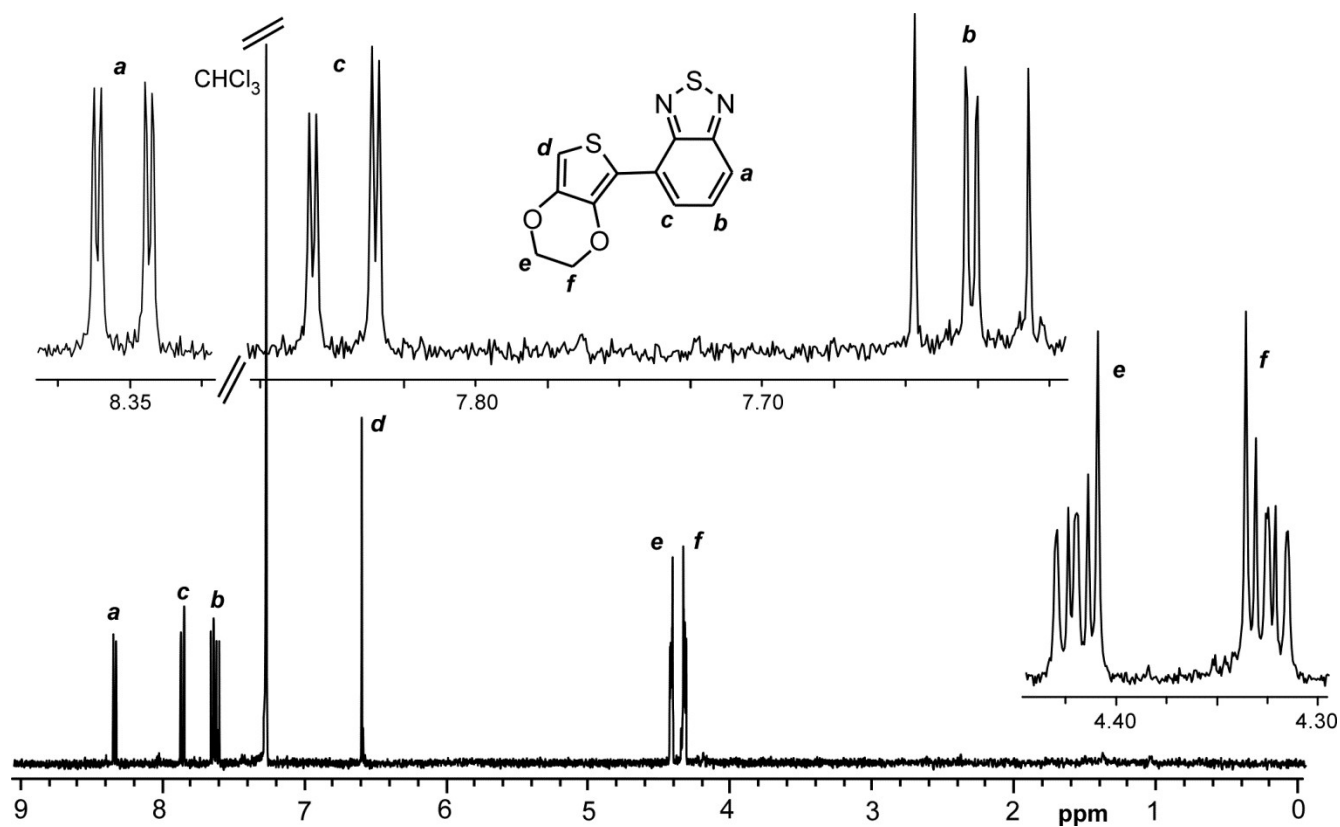

Figure S7.  $^1\text{H}$  NMR spectrum of EDOT-BTD

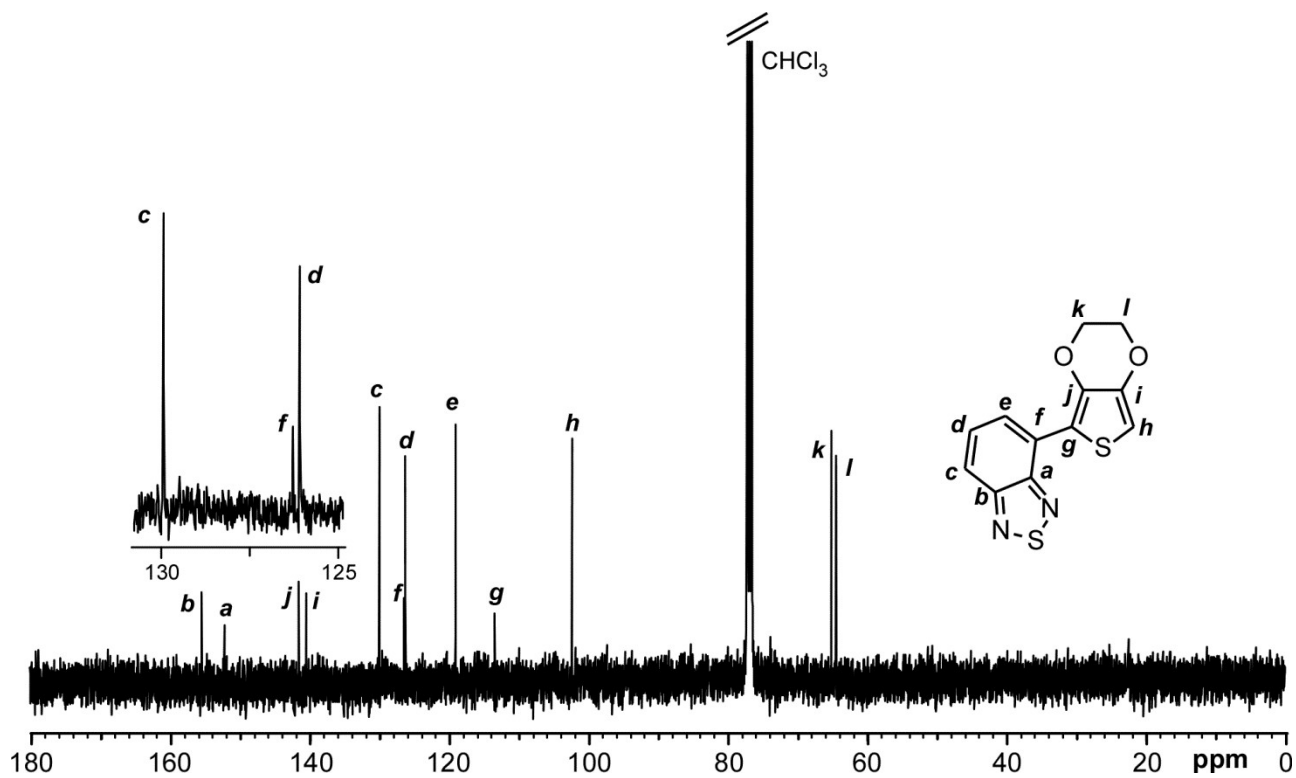

Figure S8.  $^{13}\text{C}$  NMR spectrum of EDOT-BTD

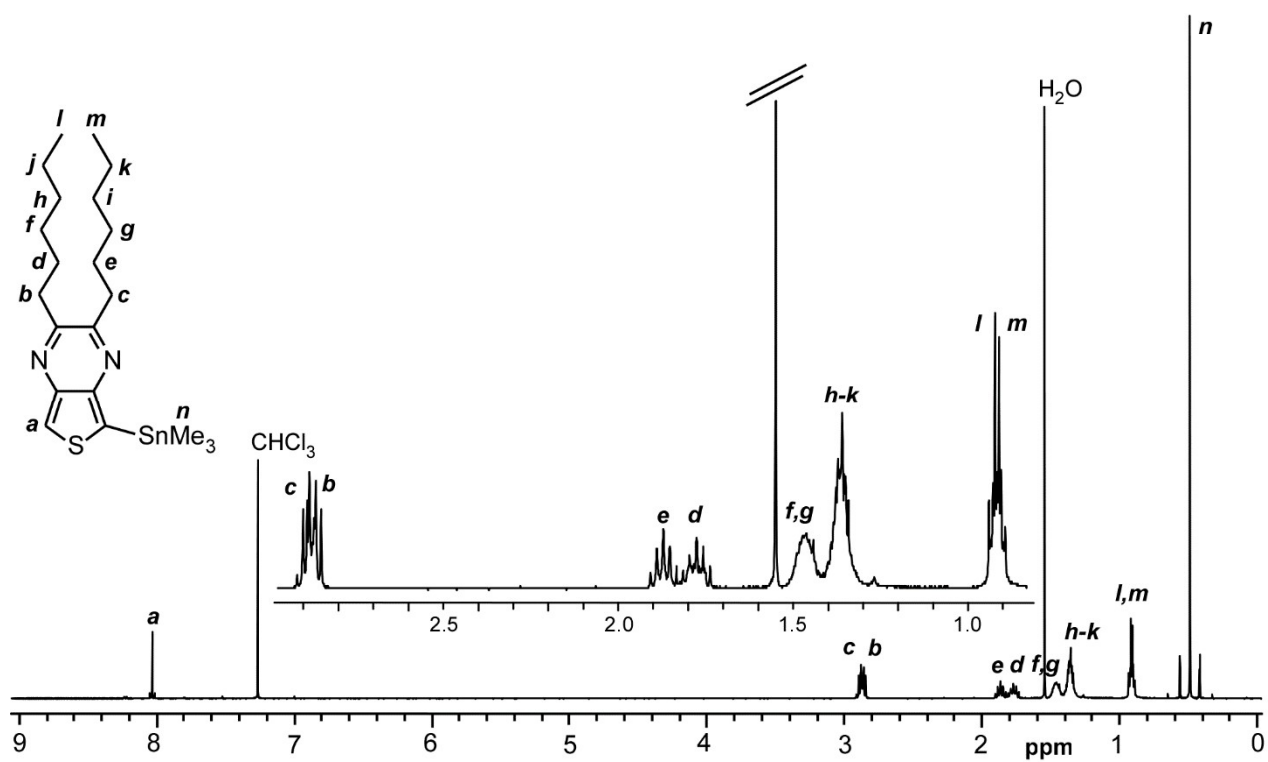

Figure S9.  $^1\text{H}$  NMR spectrum of **4**

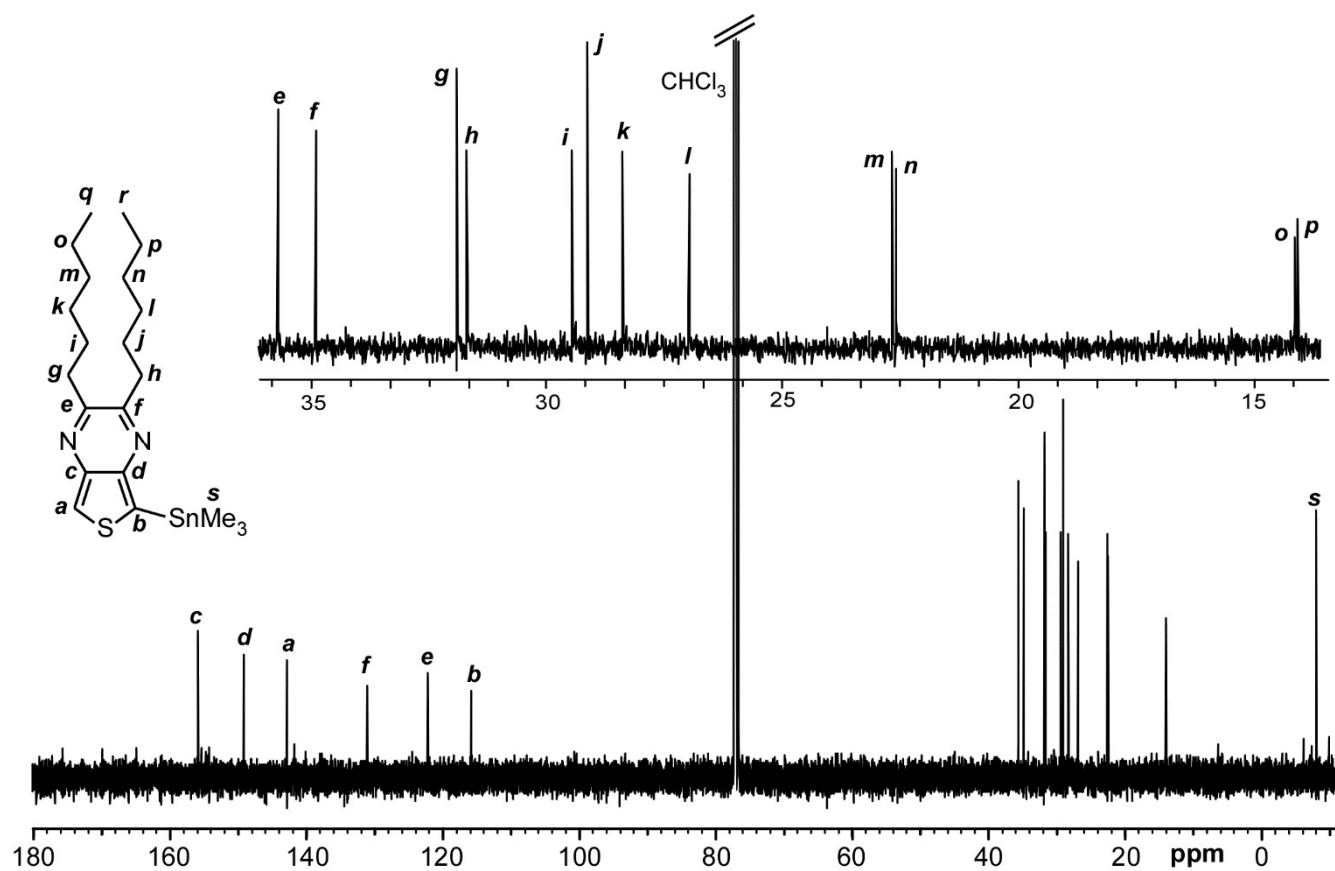

Figure S10.  $^{13}\text{C}$  NMR spectrum of **4**

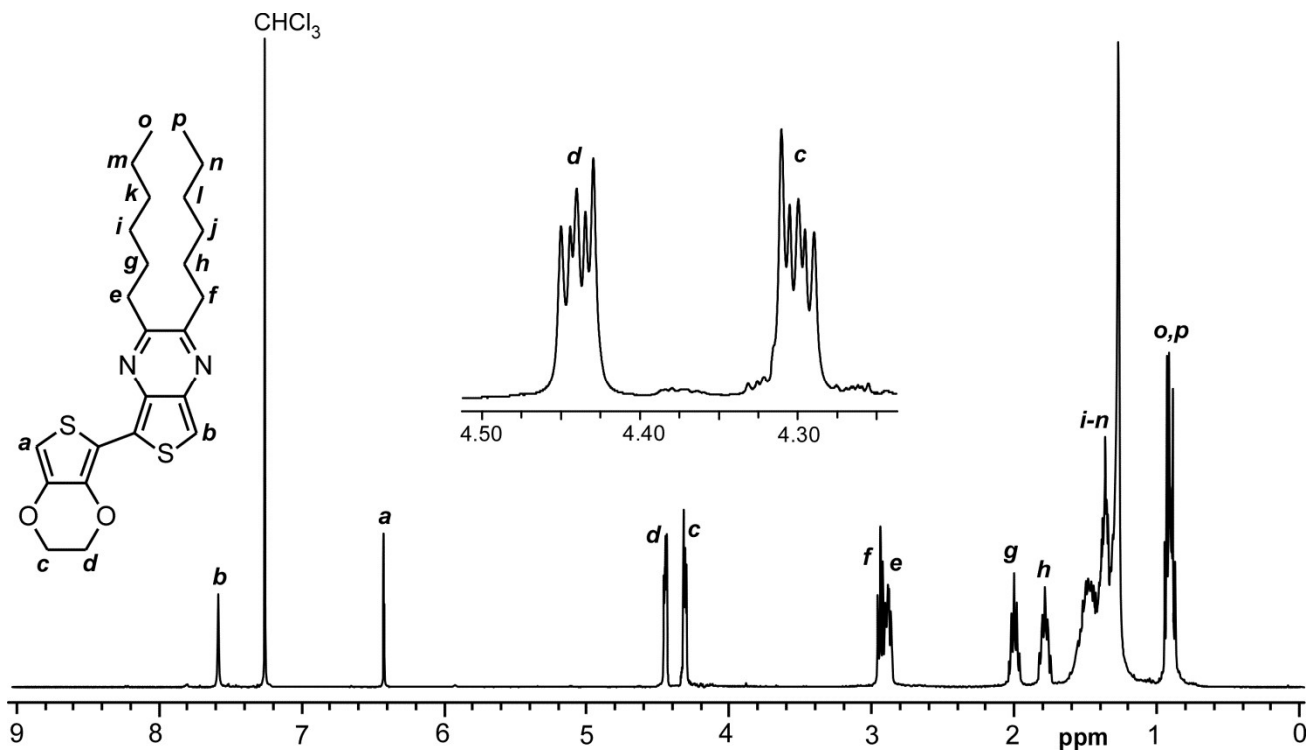

Figure S11.  $^1\text{H}$ NMR spectrum of EDOT-TP

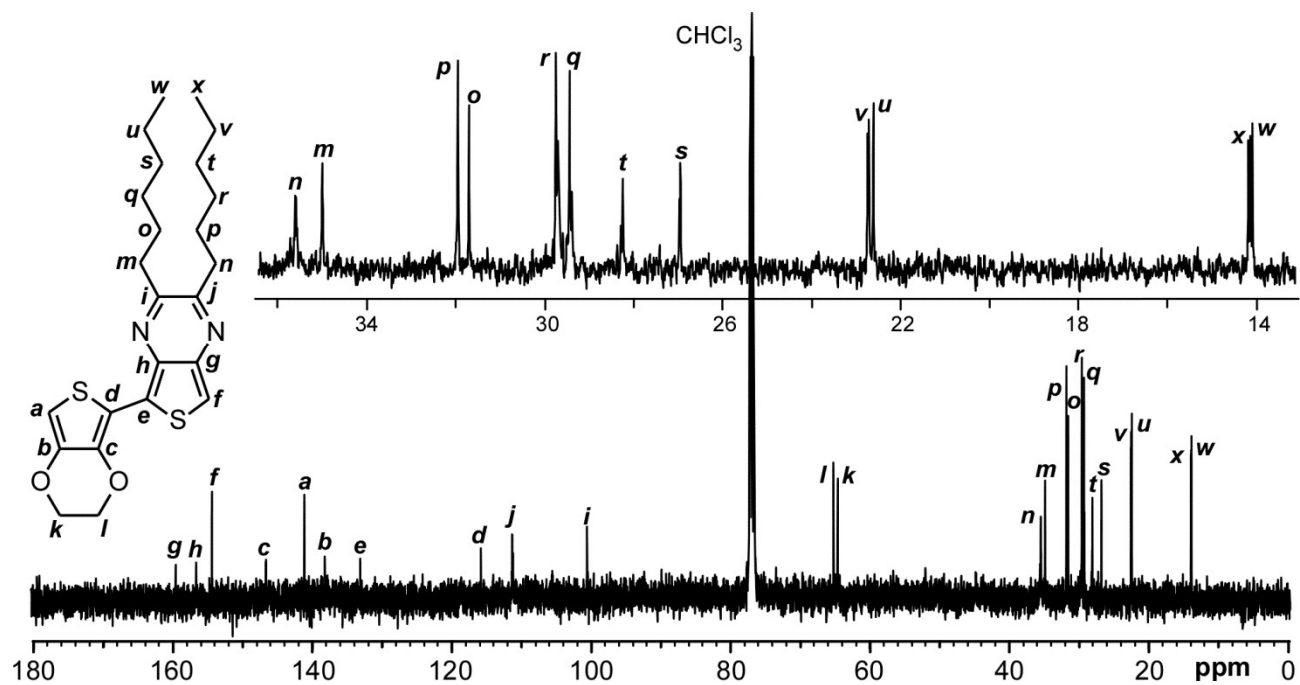

Figure S12.  $^{13}\text{C}$  NMR spectrum of EDOT-TP

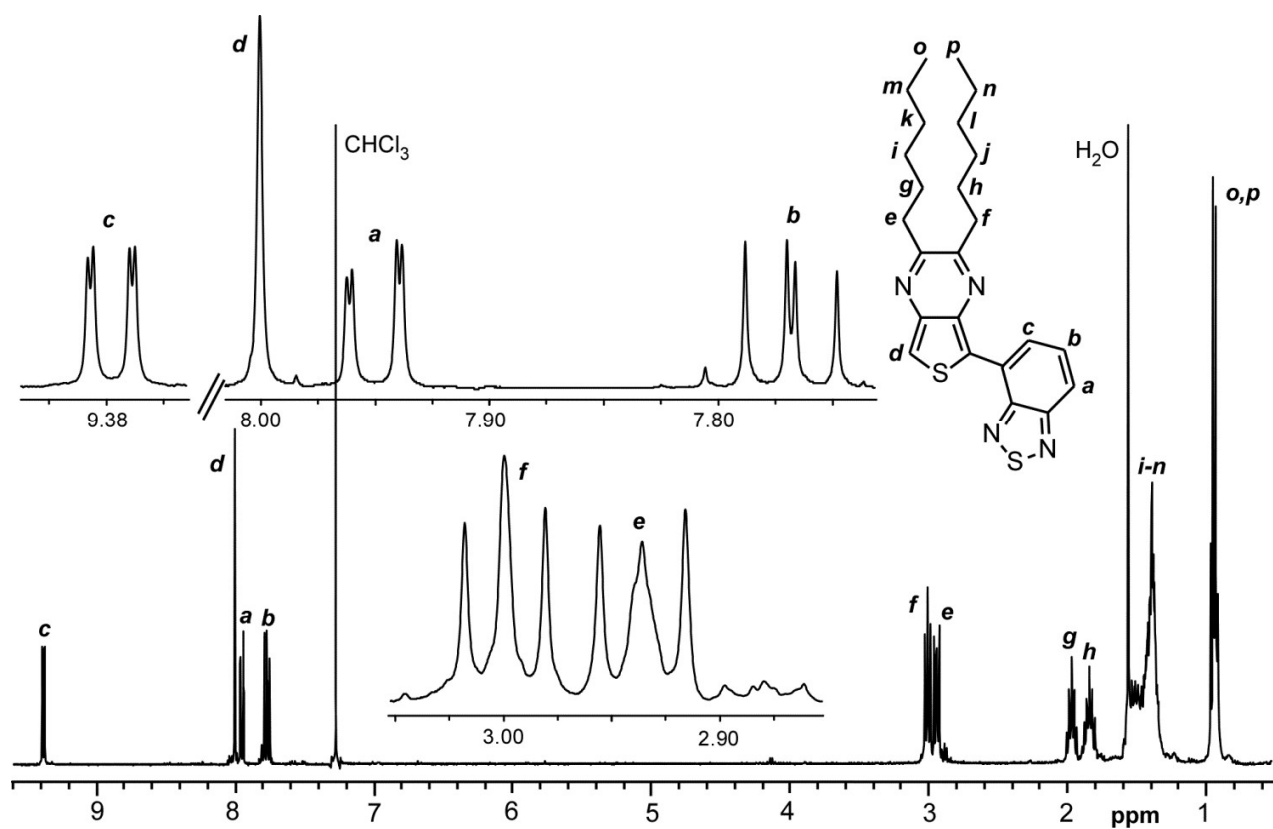

Figure S13.  $^1\text{H}$ NMR spectrum of TP-BTD

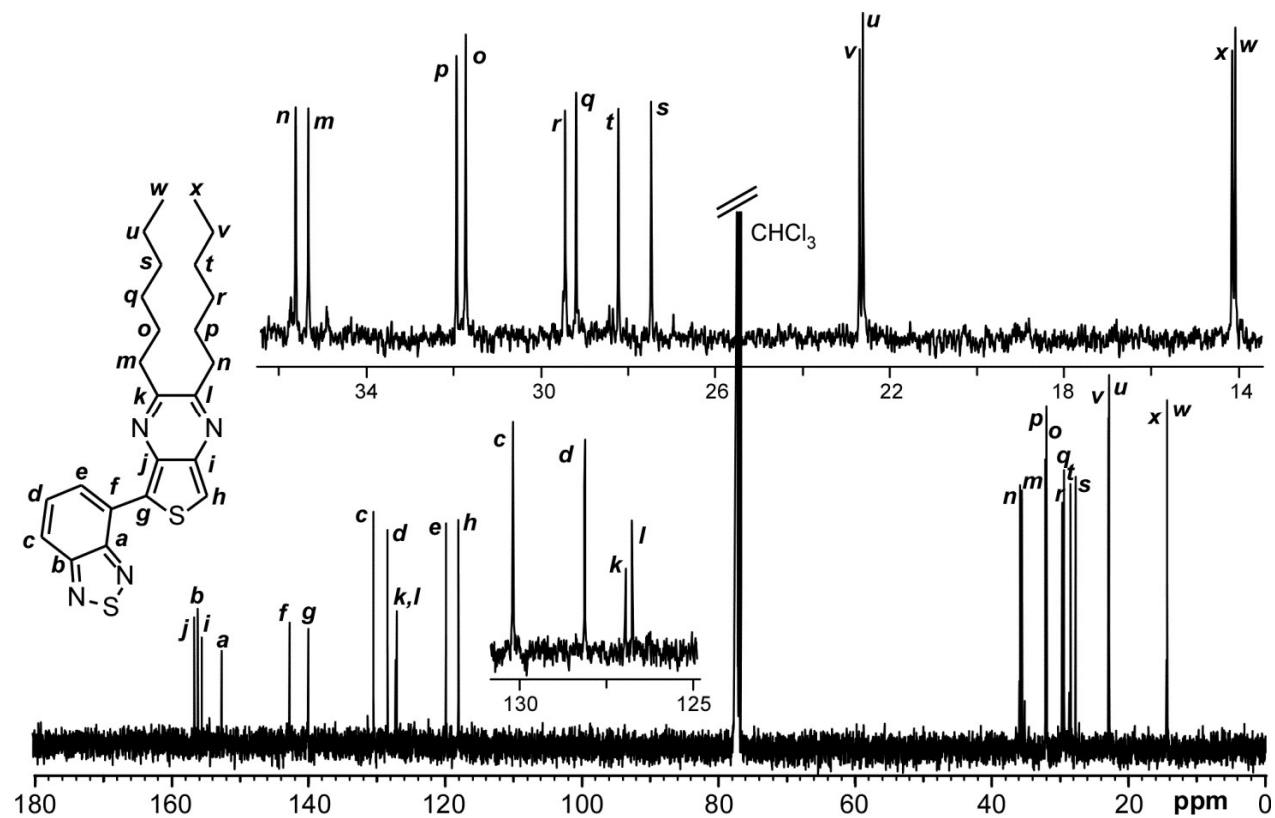

Figure S14.  $^{13}\text{C}$  NMR spectrum of TP-BTD



**Modeling of 2nd order coupling effects in the EDOT-containing dimers.** To deconvolute the complex coupling of the ethylene bridge of the EDOT units, the experimentally determined coupling constants and chemical shifts were used to simulate the NMR spectrum. This was accomplished using a freely available NMR simulator<sup>1</sup> which could accurately model the 2nd order effects inherent from the close spacing of the coupled multiplets.<sup>2</sup> The resulting simulated spectra are directly compared to the experimental spectra in Figure S14.

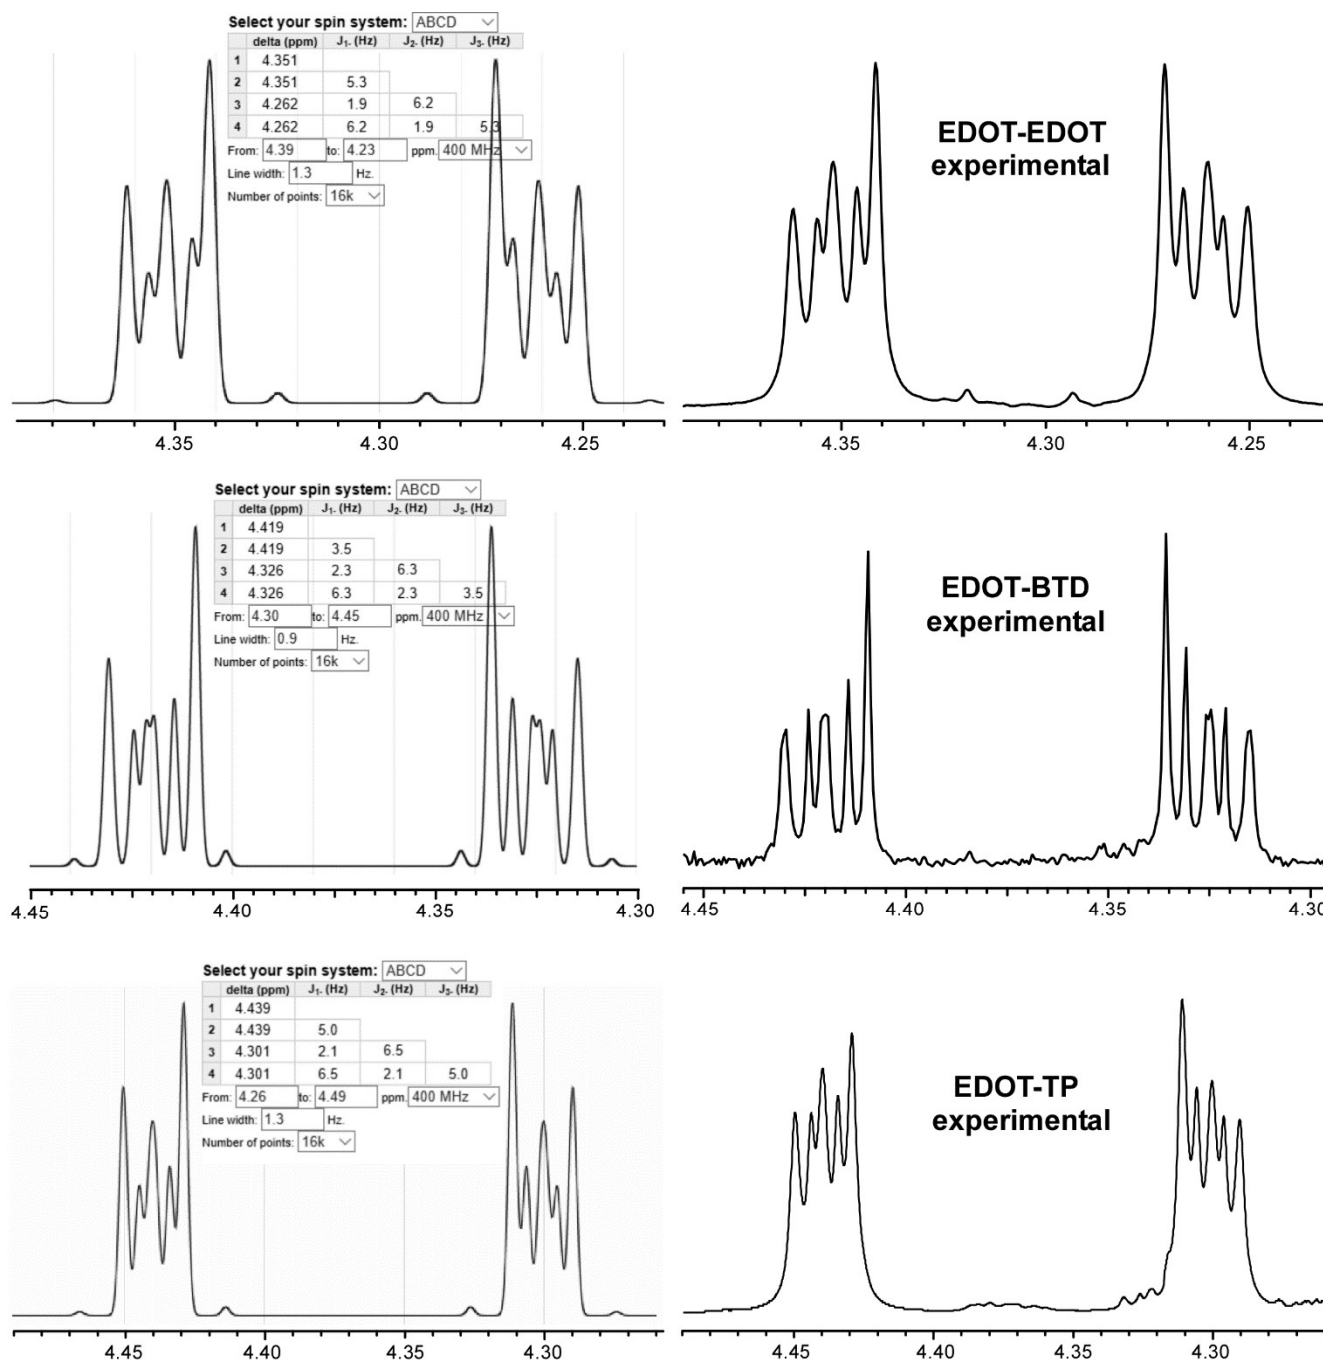

**Figure S15.** Comparison of results from modeling of 2nd order coupling effects in the <sup>1</sup>H NMR spectra of EDOT-EDOT, EDOT-BTD, and EDOT-TP.

**X-ray Crystallography.** X-ray quality crystals of **1** and **EDOT-BTD** were obtained by vapor diffusion with diethyl ether as the solvent and methanol as the antisolvent. The X-ray intensity data of the crystals were measured at either 273 or 100 K on a CCD-based X-ray diffractometer system equipped with a Cu X-ray tube ( $\lambda = 1.54178 \text{ \AA}$ ) operated at 2000 W of power. The detector was placed at a distance of 5.047 cm from the crystal. Frames were collected with a scan width of  $0.3^\circ$  in  $\omega$  and exposure time of 10 s/frame and then integrated with the Bruker SAINT software package using an arrow-frame integration algorithm. The unit cell was determined and refined by least-squares upon the refinement of XYZ-centeroids of reflections above  $20\sigma(I)$ . The structure was refined using the Bruker SHELXTL (Version 5.1) Software Package. The crystal data, data collection parameters, and refinement statistics are listed in Table S1. CCDC 2021170-2021171 contains the supplementary crystallographic data for this paper. These data can be obtained free of charge via <http://www.ccdc.cam.ac.uk/conts/retrieving.html> (or from the CCDC, 12 Union Road, Cambridge CB2 1EZ, UK; Fax: +44 1223 336033; E-mail: [deposit@ccdc.cam.ac.uk](mailto:deposit@ccdc.cam.ac.uk)).

**Table S1.** Crystallographic data for compounds **1** and **EDOT-BTD**.

|                                         | <b>1</b>                          | <b>EDOT-BTD</b>                   |
|-----------------------------------------|-----------------------------------|-----------------------------------|
| CCDC                                    | 2021170                           | 2021171                           |
| Chemical Formula                        | $C_6H_3BrN_2S$                    | $C_{12}H_8N_2O_2S_2$              |
| Formula Weight                          | 215.07                            | 276.32                            |
| Temperature (K)                         | 293.15                            | 100(2)                            |
| Crystal System                          | triclinic                         | monoclinic                        |
| Space Group                             | P-1                               | P 1 21/c 1                        |
| $a$ (Å)                                 | 7.1075(10)                        | 3.8786(6)                         |
| $b$ (Å)                                 | 7.1970(12)                        | 21.357(2)                         |
| $c$ (Å)                                 | 7.6350(10)                        | 13.401(2)                         |
| $\alpha$ (°)                            | 68.754(7)                         | 90.00                             |
| $\beta$ (°)                             | 76.414(7)                         | 96.283(10)                        |
| $\gamma$ (°)                            | 69.876(8)                         | 90.00                             |
| $V$ (Å <sup>3</sup> )                   | 339.06(9)                         | 1103.4(3)                         |
| $Z$                                     | 2                                 | 4                                 |
| $D_{\text{calc}}$ (g cm <sup>-3</sup> ) | 2.107                             | 1.663                             |
| $\mu$ (mm <sup>-1</sup> )               | 10.415                            | 4.342                             |
| Final $R$ indices [ $I > 2\sigma(I)$ ]  | $R_1 = 0.0265$<br>$wR_2 = 0.0694$ | $R_1 = 0.0817$<br>$wR_2 = 0.1948$ |
| $R$ indices (all data) <sup>a</sup>     | $R_1 = 0.0277$<br>$wR_2 = 0.0769$ | $R_1 = 0.1251$<br>$wR_2 = 0.2239$ |

$$^a R_1 = \Sigma(|F_o| - |F_c|) / \Sigma|F_o|, wR_2 = [\Sigma(w(F_o^2 - F_c^2)^2) / \Sigma(F_o^2)^2]^{1/2}$$

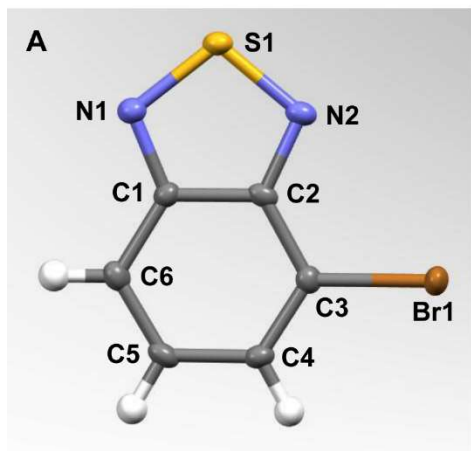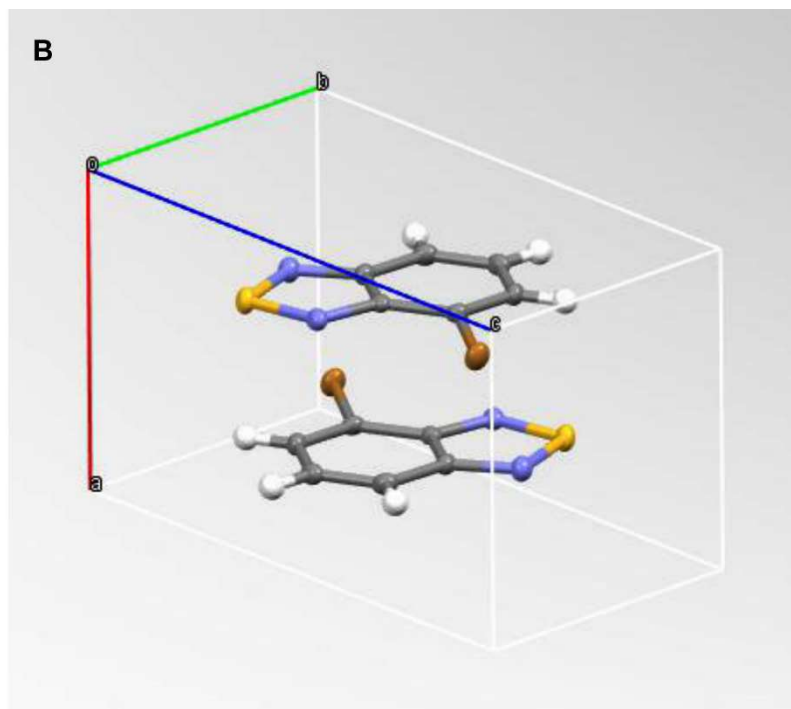

**Figure S16.** Thermal ellipsoid plot (50% probability level) and unit cell of **1**.

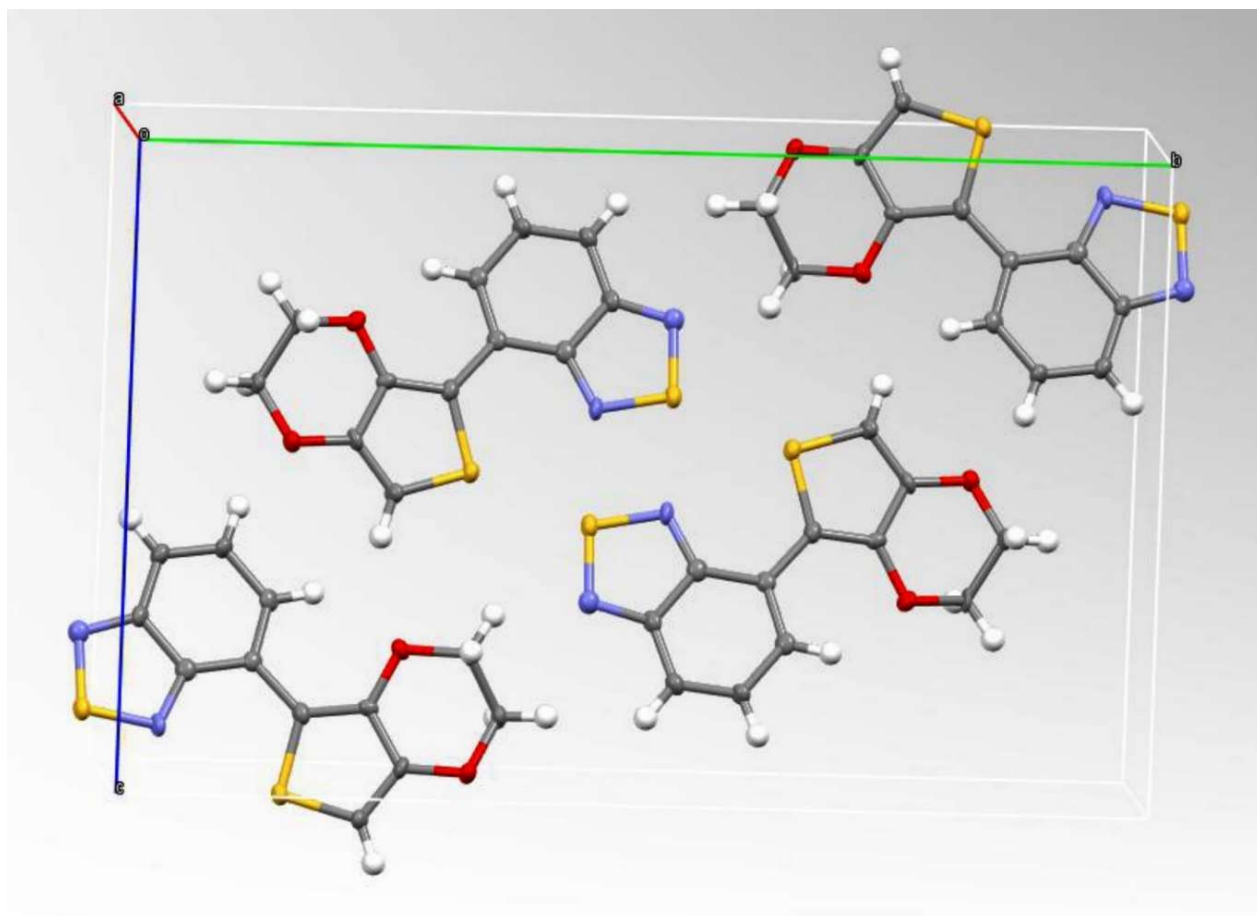

**Figure S17.** Unit cell of **EDOT-BTD** (thermal ellipsoids at the 50% probability level).

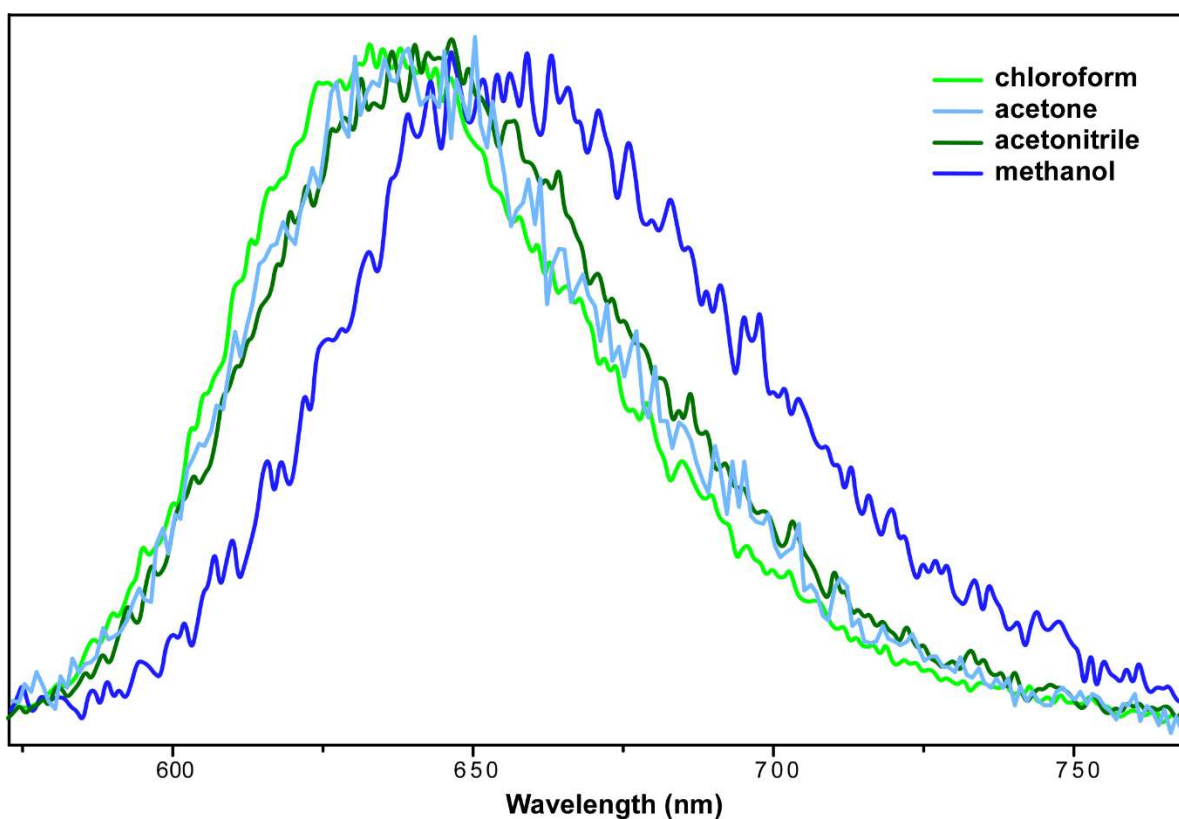

Figure S18. Solvatochromism in the emission spectra of BTD-BTD.

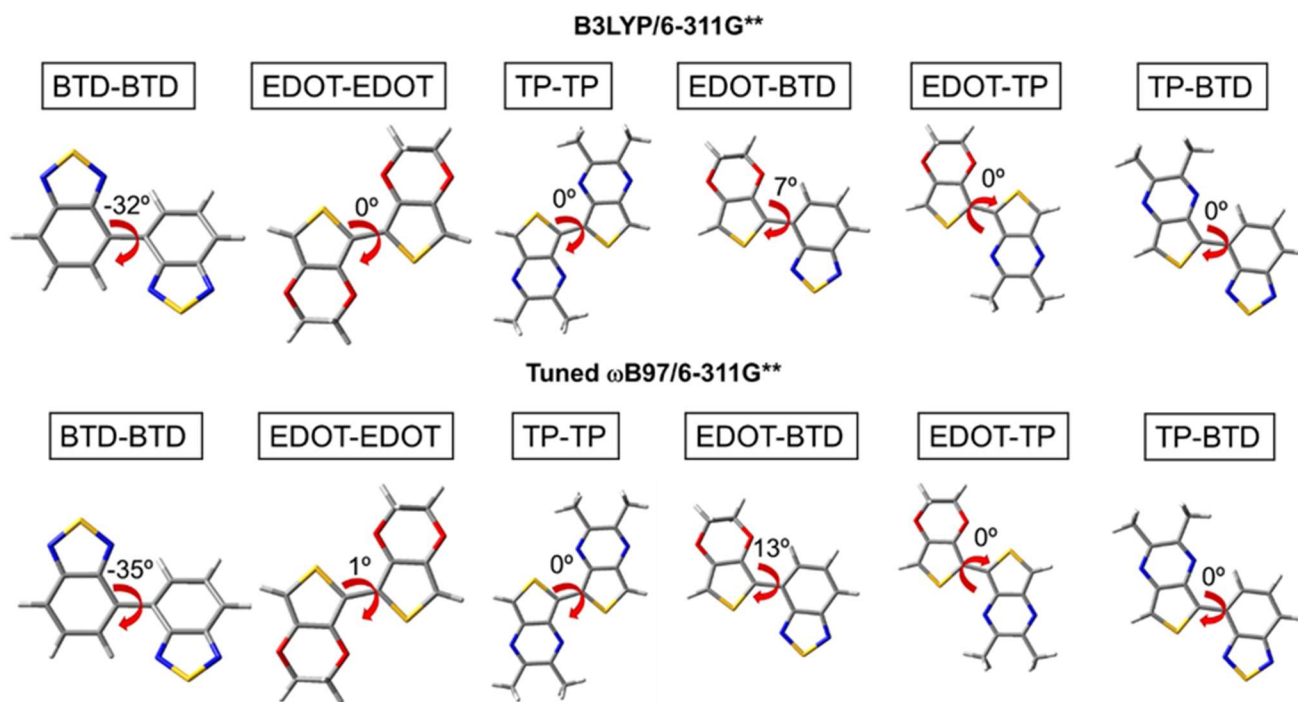

Figure S19. DFT-calculated interannular torsional angles

**Table S2.** Comparison of the experimental (averaged X-Ray) and DFT-calculated geometric parameters of EDOT-BTD.

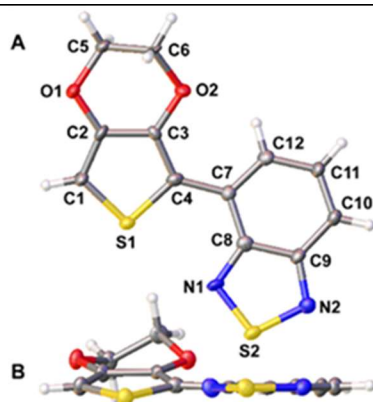

| Bond length (Å) |      |       |              | Bond angle (°)    |      |       |              |
|-----------------|------|-------|--------------|-------------------|------|-------|--------------|
|                 | Exp. | B3LYP | $\omega$ B97 |                   | Exp. | B3LYP | $\omega$ B97 |
| S(1)-C(1)       | 1.72 | 1.73  | 1.72         | C(1)-S(1)-C(4)    | 93   | 92    | 93           |
| S(1)-C(4)       | 1.74 | 1.76  | 1.75         | S(1)-C(1)-C(2)    | 111  | 112   | 112          |
| C(1)-C(2)       | 1.35 | 1.36  | 1.37         | C(1)-C(2)-C(3)    | 113  | 113   | 113          |
| C(2)-C(3)       | 1.41 | 1.43  | 1.44         | C(2)-C(3)-C(4)    | 114  | 114   | 114          |
| C(3)-C(4)       | 1.38 | 1.39  | 1.39         | S(1)-C(4)-C(3)    | 109  | 109   | 109          |
| C(4)-C(7)       | 1.47 | 1.46  | 1.48         | S(1)-C(4)-C(7)    | 123  | 123   | 123          |
| C(7)-C(8)       | 1.43 | 1.44  | 1.45         | C(4)-C(7)-C(8)    | 122  | 122   | 122          |
| C(7)-C(12)      | 1.38 | 1.39  | 1.39         | C(7)-C(8)-C(9)    | 121  | 121   | 121          |
| C(8)-C(9)       | 1.45 | 1.45  | 1.45         | N(1)-C(8)-C(9)    | 113  | 113   | 113          |
| C(9)-C(10)      | 1.41 | 1.42  | 1.43         | N(1)-S(2)-N(2)    | 101  | 100   | 100          |
| C(10)-C(11)     | 1.36 | 1.37  | 1.37         | S(2)-N(2)-C(9)    | 106  | 107   | 107          |
| C(11)-C(12)     | 1.42 | 1.42  | 1.44         | C(8)-C(9)-C(10)   | 121  | 121   | 121          |
| N(1)-C(8)       | 1.35 | 1.33  | 1.34         | C(9)-C(10)-C(11)  | 118  | 117   | 117          |
| N(1)-S(2)       | 1.61 | 1.64  | 1.63         | C(10)-C(11)-C(12) | 122  | 123   | 123          |
| S(2)-N(2)       | 1.62 | 1.64  | 1.63         |                   |      |       |              |
| N(2)-C(9)       | 1.35 | 1.34  | 1.34         |                   |      |       |              |

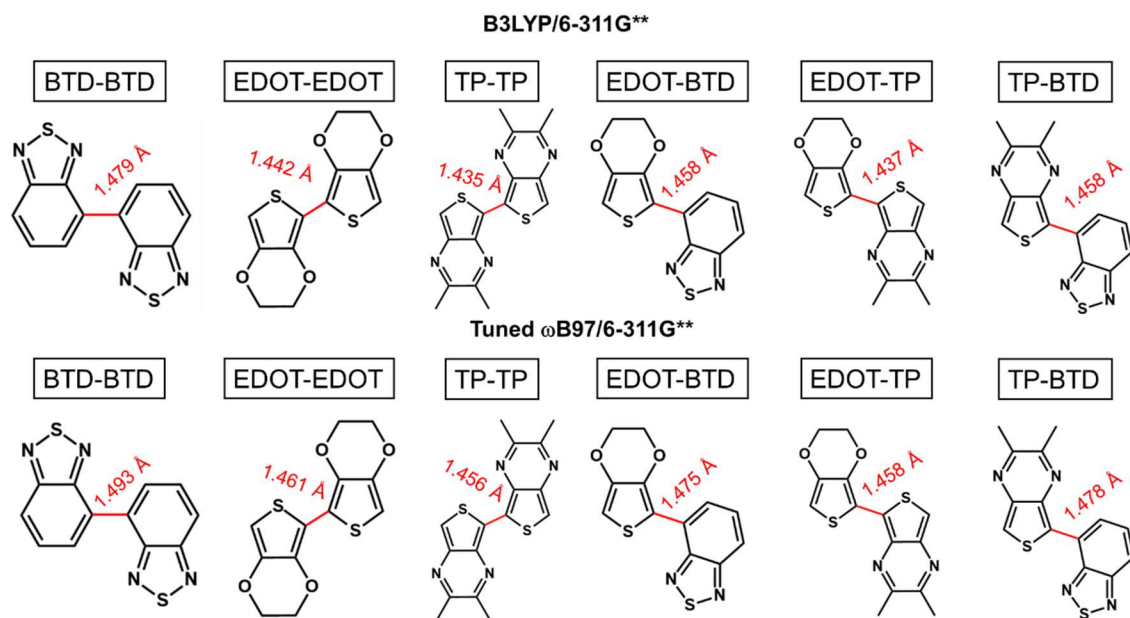

**Figure S20.** DFT-calculated interannular bond lengths.

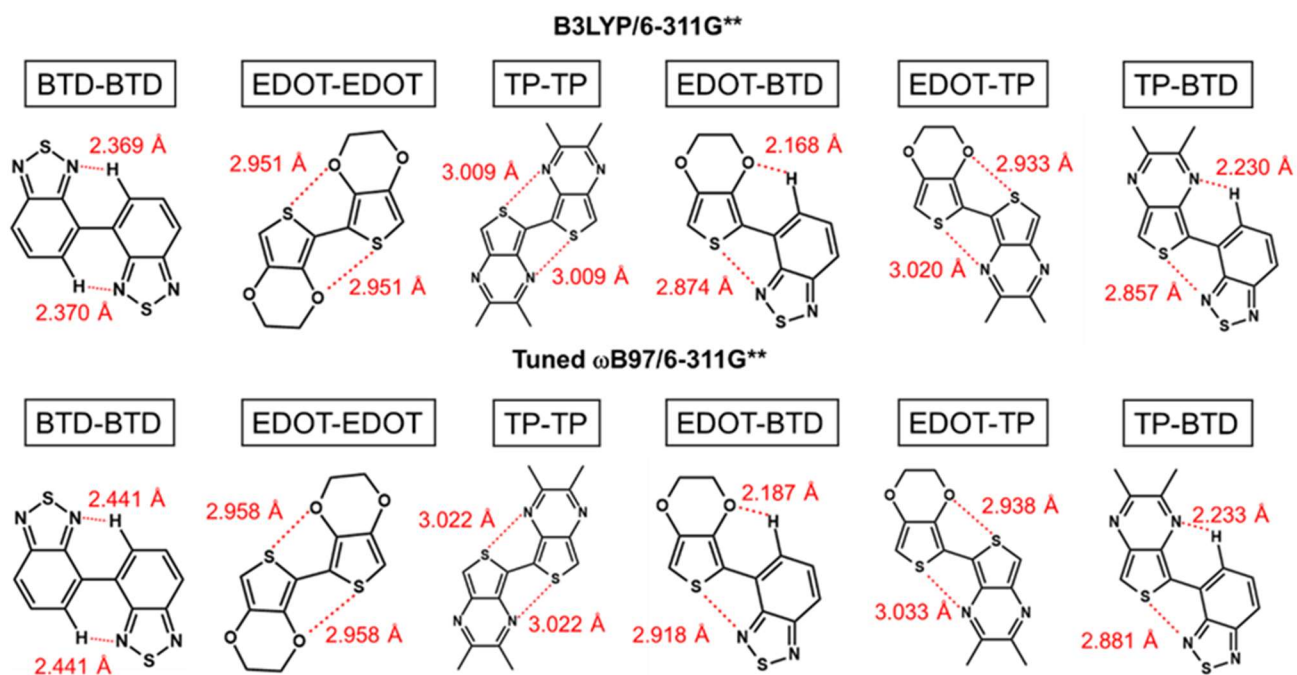

**Figure S21.** DFT-calculated intramolecular distances.

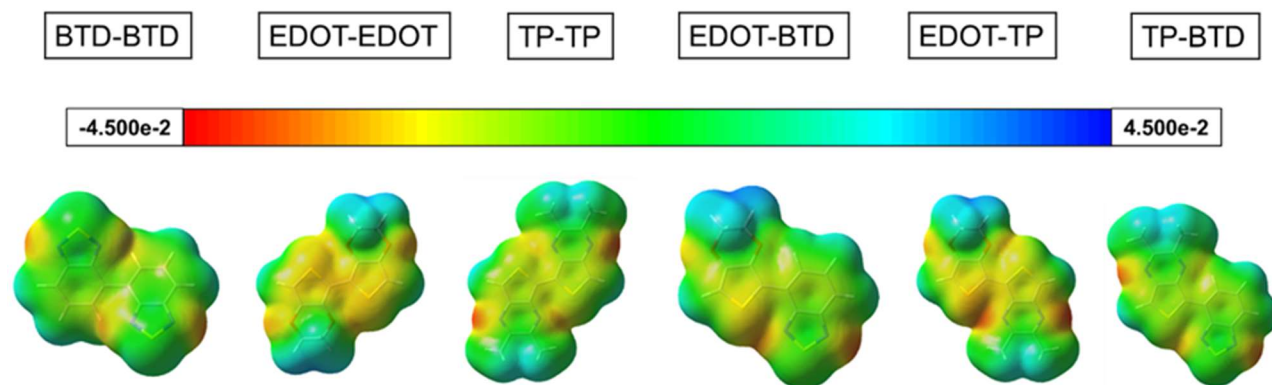

**Figure S22.** Electrostatic surface potentials (tuned  $\omega$ B97/6-311G\*\* level) for the dimer series of EDOT, TP and BTD units. Electrostatic potentials are scaled from negative (red) to positive (blue) values; green corresponds to neutral charge.



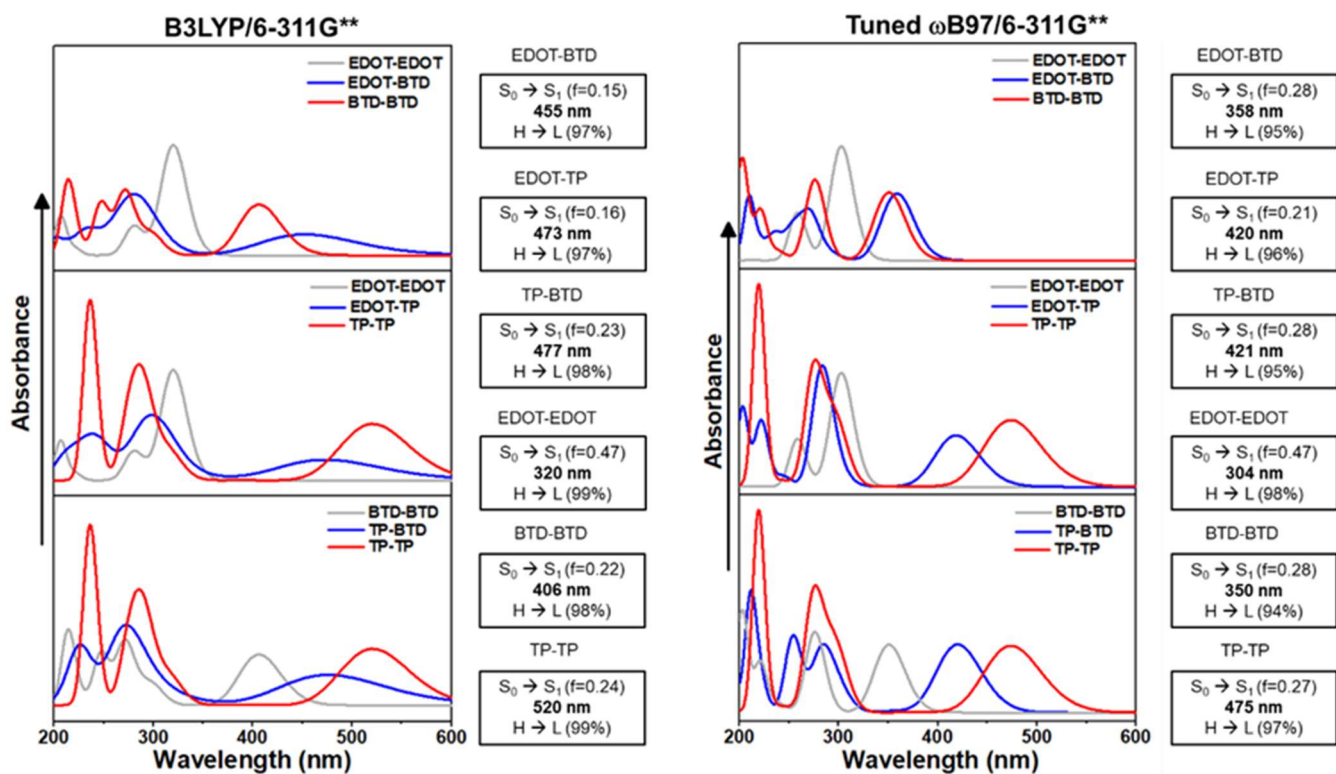

Figure S23. TD-DFT calculated absorption spectra

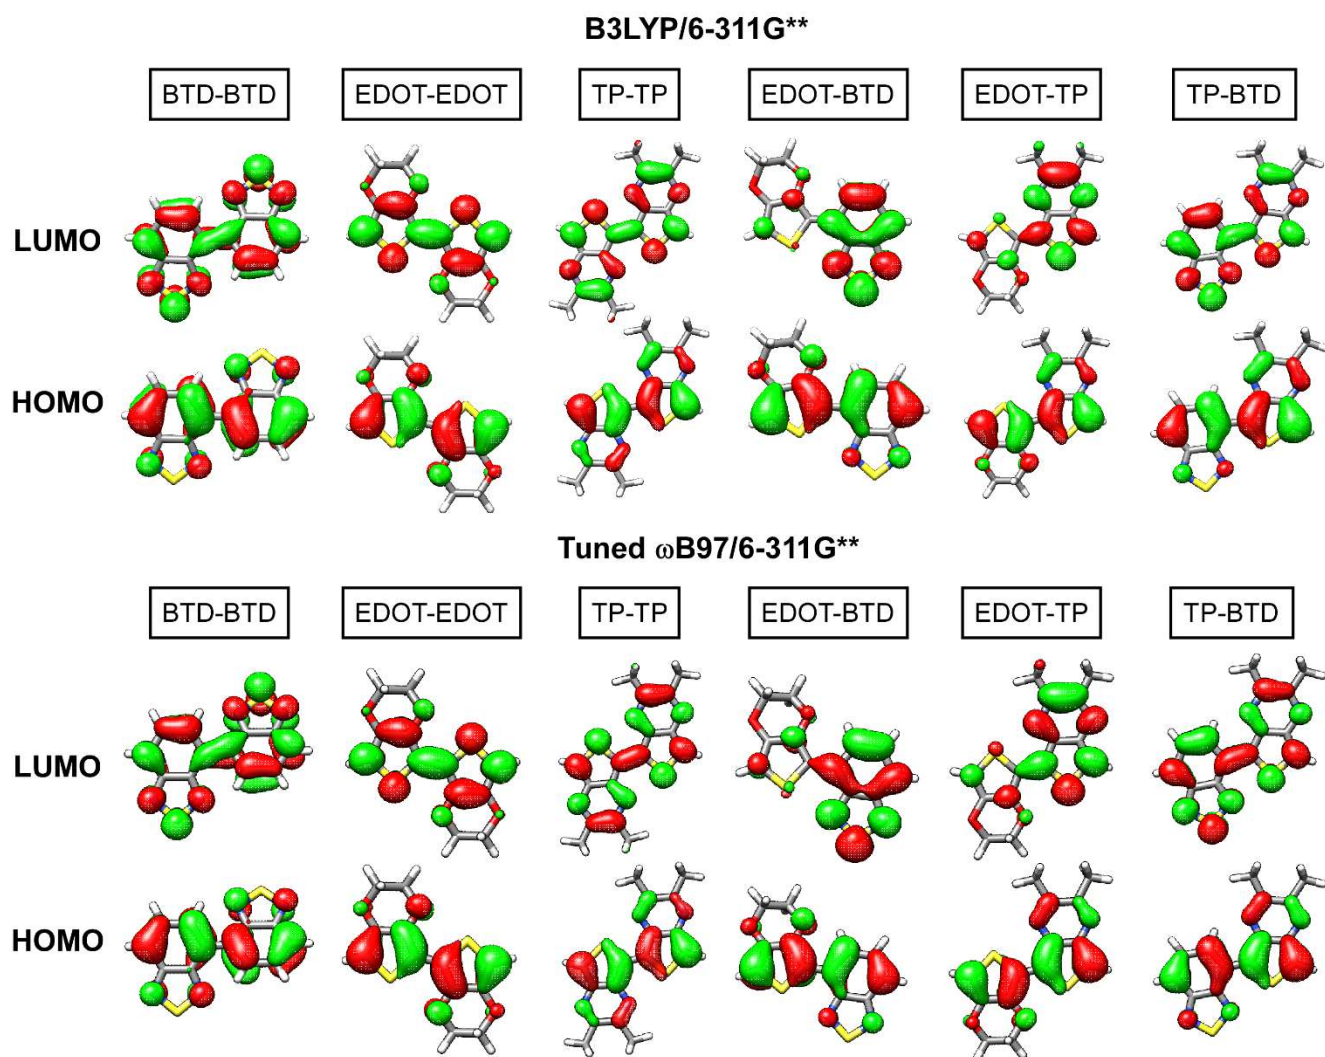

**Figure S24.** DFT-calculated frontier molecular orbital topologies (isovalue surface 0.03 a.u.).

**Table S3.** Tuned  $\omega$  values ( $\text{bohr}^{-1}$ ) for the symmetrical and asymmetrical dimers, at the  $\omega$ B97/6-311G\*\* level.

|           | $\omega$ values ( $\text{bohr}^{-1}$ ) |
|-----------|----------------------------------------|
| BTD-BTD   | 0.2297                                 |
| EDOT-EDOT | 0.2339                                 |
| TP-TP     | 0.2010                                 |
| EDOT-BTD  | 0.2708                                 |
| EDOT-TP   | 0.2232                                 |
| TP-BTD    | 0.2125                                 |



**Cartesian coordinates and energies of all calculated dimers at the B3LYP/6-311G\*\* level.**

**BTD-BTD**

$E_{el}$  (B3LYP/6-311G\*\*) = -1476.44407570 a.u.

|   |             |             |             |
|---|-------------|-------------|-------------|
| C | 1.70441600  | -2.60878800 | 0.69648800  |
| C | 0.55471200  | -1.76696400 | 0.66600100  |
| C | 0.60333200  | -0.42746800 | 0.33793600  |
| C | 1.90848400  | 0.09100000  | 0.00712000  |
| C | 3.07418800  | -0.77752100 | 0.03085800  |
| C | 2.95264500  | -2.14650300 | 0.38967600  |
| N | 2.20284000  | 1.34093400  | -0.36170400 |
| S | 3.81693200  | 1.39222100  | -0.64554000 |
| N | 4.20868800  | -0.16272300 | -0.31427000 |
| C | -1.70419200 | 2.60867700  | 0.69655300  |
| C | -0.55456800 | 1.76674800  | 0.66606200  |
| C | -1.90851800 | -0.09109300 | 0.00717200  |
| C | -3.07415300 | 0.77755000  | 0.03094700  |
| C | -2.95246400 | 2.14651900  | 0.38976800  |
| N | -2.20300800 | -1.34097500 | -0.36166300 |
| S | -3.81711300 | -1.39204900 | -0.64557800 |
| N | -4.20871100 | 0.16291500  | -0.31423100 |
| C | -0.60330900 | 0.42725600  | 0.33805500  |
| H | 1.56788700  | -3.64753100 | 0.97463300  |
| H | -0.40060500 | -2.20841500 | 0.90874500  |
| H | 3.83222200  | -2.77661000 | 0.40717100  |
| H | -1.56756200 | 3.64741900  | 0.97465000  |
| H | 0.40082400  | 2.20812000  | 0.90866700  |
| H | -3.83197300 | 2.77672200  | 0.40724800  |

**EDOT-BTD**

$E_{el}$  (B3LYP/6-311G\*\*) = -1518.59100507 a.u.

|   |             |             |             |
|---|-------------|-------------|-------------|
| C | -0.59724100 | -0.26063400 | 0.04978300  |
| C | -1.91938600 | 0.14758000  | -0.01482300 |
| C | -2.86333700 | -0.92202800 | 0.01139800  |
| C | -2.27107800 | -2.14602800 | 0.09101900  |
| S | -0.54714900 | -2.02168600 | 0.12600900  |
| O | -2.32308600 | 1.45320600  | -0.08979300 |
| C | -3.68951300 | 1.60054100  | -0.50750200 |
| C | -4.58343700 | 0.63071300  | 0.24280200  |
| O | -4.21529700 | -0.71965200 | -0.05588900 |
| C | 1.70584300  | 2.77835500  | 0.17868700  |
| C | 0.54608100  | 1.95350600  | 0.16750100  |
| C | 0.59946800  | 0.57131700  | 0.07197100  |
| C | 1.92691000  | 0.01102100  | -0.00370700 |
| C | 3.10429200  | 0.86236600  | 0.01135700  |
| C | 2.97447000  | 2.27293300  | 0.10220700  |
| N | 2.22322000  | -1.28538000 | -0.08771400 |
| S | 3.85882200  | -1.40529500 | -0.14367000 |
| N | 4.25246600  | 0.18342100  | -0.06356400 |
| H | -2.75822300 | -3.10734700 | 0.12030700  |
| H | -3.96005400 | 2.63461300  | -0.29291400 |
| H | -3.76024400 | 1.42324800  | -1.58652900 |

|   |             |            |             |
|---|-------------|------------|-------------|
| H | -5.62344200 | 0.74024400 | -0.06605800 |
| H | -4.50765100 | 0.80645300 | 1.32274600  |
| H | 1.56118000  | 3.85041600 | 0.25440800  |
| H | -0.41734400 | 2.43405500 | 0.23842200  |
| H | 3.85782400  | 2.89743600 | 0.11242300  |

**EDOT-EDOT**  $E_{el}$  (B3LYP/6-311G\*\*) = -1560.73527605 a.u.

|   |             |             |             |
|---|-------------|-------------|-------------|
| C | 0.60849000  | -0.38678800 | -0.00632900 |
| C | 1.90700100  | 0.07091000  | -0.00477000 |
| C | 2.89257400  | -0.96162500 | 0.00231200  |
| C | 2.35110800  | -2.21123800 | 0.00633600  |
| S | 0.61547400  | -2.14871600 | 0.00170800  |
| O | 2.23868500  | 1.39870100  | -0.02396600 |
| C | 3.60207900  | 1.63196600  | 0.35604800  |
| C | 4.52671100  | 0.65978800  | -0.35675700 |
| O | 4.23391600  | -0.69119000 | 0.02164500  |
| C | -1.90700400 | -0.07094100 | -0.00462700 |
| C | -2.89254900 | 0.96163200  | 0.00239300  |
| C | -2.35106800 | 2.21123400  | 0.00629400  |
| S | -0.61545400 | 2.14869900  | 0.00167500  |
| O | -2.23870300 | -1.39870200 | -0.02372100 |
| C | -3.60220200 | -1.63202600 | 0.35582500  |
| C | -4.52666000 | -0.65964800 | -0.35692700 |
| O | -4.23390200 | 0.69120000  | 0.02189700  |
| C | -0.60848200 | 0.38675600  | -0.00626500 |
| H | 2.87066100  | -3.15528000 | 0.01246900  |
| H | 3.82361100  | 2.66176000  | 0.07509600  |
| H | 3.70289000  | 1.52230300  | 1.44210500  |
| H | 5.56596200  | 0.83565600  | -0.07709100 |
| H | 4.42185100  | 0.77016300  | -1.44278700 |
| H | -2.87065700 | 3.15526100  | 0.01210300  |
| H | -3.82369200 | -2.66173500 | 0.07451000  |
| H | -3.70331400 | -1.52269800 | 1.44188800  |
| H | -5.56595800 | -0.83561400 | -0.07748700 |
| H | -4.42162700 | -0.76974600 | -1.44297100 |

**EDOT-TP**  $E_{el}$  (B3LYP/6-311G\*\*) = -1597.24787072 a.u.

|   |             |             |             |
|---|-------------|-------------|-------------|
| C | 1.01360600  | -0.32182400 | -0.00014300 |
| C | 2.35666500  | -0.00726000 | 0.00897800  |
| C | 3.22366700  | -1.13886200 | 0.01797600  |
| C | 2.54498200  | -2.31994600 | 0.02022000  |
| S | 0.82485200  | -2.07370500 | 0.01061600  |
| O | 2.82554500  | 1.27628600  | -0.00358900 |
| C | 4.21244900  | 1.36475500  | 0.36012300  |
| C | 5.02038700  | 0.29341900  | -0.35237200 |
| O | 4.58649100  | -1.01488500 | 0.03900900  |
| C | -0.10304800 | 0.58313700  | -0.01150000 |
| C | -1.46747700 | 0.28074500  | -0.00809900 |
| C | -2.31958700 | 1.43982600  | -0.01677600 |
| C | -1.60928800 | 2.62073600  | -0.02960200 |
| S | 0.08502900  | 2.31961100  | -0.03015900 |

|   |             |             |             |
|---|-------------|-------------|-------------|
| N | -1.98855300 | -0.97689900 | 0.00233600  |
| C | -3.29329800 | -1.08132400 | 0.00507700  |
| C | -4.15885300 | 0.09635800  | -0.00243600 |
| N | -3.68262700 | 1.31369100  | -0.01315000 |
| C | -5.65615000 | -0.06351400 | 0.00176900  |
| C | -3.88626500 | -2.46448100 | 0.01622000  |
| H | 2.95948300  | -3.31496900 | 0.02701500  |
| H | 4.53902300  | 2.36295200  | 0.06823600  |
| H | 4.31024100  | 1.25320100  | 1.44587700  |
| H | 6.07447800  | 0.35913900  | -0.08117000 |
| H | 4.91994200  | 0.40674400  | -1.43852500 |
| H | -1.99274700 | 3.62825100  | -0.03882700 |
| H | -5.99859600 | -0.60957700 | 0.88669800  |
| H | -6.11683100 | 0.92312300  | -0.00518900 |
| H | -6.00211200 | -0.62362800 | -0.87294700 |
| H | -3.08223800 | -3.19882200 | 0.02033100  |
| H | -4.51532500 | -2.62367100 | 0.89812900  |
| H | -4.51817400 | -2.63657900 | -0.86121400 |

**TP-BTD**

$E_{el}$  (B3LYP/6-311G\*\*) = -1555.10217548 a.u.

|   |             |             |             |
|---|-------------|-------------|-------------|
| C | 1.47454400  | 0.18159700  | 0.00011300  |
| C | 2.27918500  | 1.37486700  | 0.00016500  |
| C | 1.52044700  | 2.52787500  | 0.00036600  |
| S | -0.15013800 | 2.16909400  | 0.00052300  |
| N | 2.07462900  | -1.04540700 | -0.00020800 |
| C | 3.38408400  | -1.07858000 | -0.00036400 |
| C | 4.18930300  | 0.13642300  | -0.00020800 |
| N | 3.64389600  | 1.32444400  | 0.00002100  |
| C | 5.69271500  | 0.05858200  | -0.00030900 |
| C | 4.04881000  | -2.42890000 | -0.00056600 |
| C | 0.09163300  | 0.43748300  | 0.00031500  |
| C | -1.88726200 | -2.82066900 | 0.00067700  |
| C | -0.81973100 | -1.88057300 | 0.00068100  |
| C | -1.01833800 | -0.50825200 | 0.00031100  |
| C | -2.39766100 | -0.08443500 | -0.00004300 |
| C | -3.47986900 | -1.05390300 | -0.00003500 |
| C | -3.20313300 | -2.44608000 | 0.00033300  |
| N | -2.82921600 | 1.17614500  | -0.00035900 |
| S | -4.47067300 | 1.12665100  | -0.00066100 |
| N | -4.69365200 | -0.49599800 | -0.00039000 |
| H | 1.87246200  | 3.54732100  | 0.00074100  |
| H | 6.06716900  | -0.47541800 | 0.87892500  |
| H | 6.06707000  | -0.47303300 | -0.88104900 |
| H | 6.09859200  | 1.06900200  | 0.00096400  |
| H | 3.28734500  | -3.20727200 | -0.00185900 |
| H | 4.68863100  | -2.55888300 | -0.87934800 |
| H | 4.68666100  | -2.56001400 | 0.87950500  |
| H | -1.63125700 | -3.87434300 | 0.00097500  |
| H | 0.19584600  | -2.24784200 | 0.00095800  |
| H | -4.01751400 | -3.15832600 | 0.00032200  |

**TP-TP**

$E_{el}$  (B3LYP/6-311G\*\*) = -1633.76016553 a.u.

|   |             |             |             |
|---|-------------|-------------|-------------|
| C | -0.40677500 | 0.59081300  | -0.00011800 |
| C | 0.00595900  | 1.92789000  | -0.00000900 |
| C | -1.07900100 | 2.87017000  | -0.00004200 |
| C | -2.31247500 | 2.25300100  | -0.00016200 |
| S | -2.15362600 | 0.54036800  | -0.00016600 |
| N | 1.30102600  | 2.34533100  | 0.00011600  |
| C | 1.51013700  | 3.63857400  | 0.00019500  |
| C | 0.40677500  | 4.59592000  | 0.00011300  |
| N | -0.84511600 | 4.21772400  | 0.00002800  |
| C | 0.68579300  | 6.07552400  | 0.00009600  |
| C | 2.93621700  | 4.11812100  | 0.00016100  |
| H | -3.28544900 | 2.71804300  | -0.00021400 |
| H | 1.26417500  | 6.37462300  | -0.87997500 |
| H | -0.26094500 | 6.61341900  | 0.00025100  |
| H | 1.26455300  | 6.37473000  | 0.87986400  |
| H | 3.60444700  | 3.25838200  | 0.00084600  |
| H | 3.15144100  | 4.73295400  | -0.87982700 |
| H | 3.15115400  | 4.73423800  | 0.87929700  |
| C | 0.40677500  | -0.59081300 | -0.00011800 |
| C | -0.00595900 | -1.92789000 | -0.00000900 |
| S | 2.15362600  | -0.54036800 | -0.00016600 |
| C | 1.07900100  | -2.87017000 | -0.00004200 |
| N | -1.30102600 | -2.34533100 | 0.00011600  |
| C | 2.31247500  | -2.25300100 | -0.00016200 |
| N | 0.84511600  | -4.21772400 | 0.00002800  |
| C | -1.51013700 | -3.63857400 | 0.00019500  |
| H | 3.28544900  | -2.71804300 | -0.00021400 |
| C | -0.40677500 | -4.59592000 | 0.00011300  |
| C | -2.93621700 | -4.11812100 | 0.00016100  |
| C | -0.68579300 | -6.07552400 | 0.00009600  |
| H | -3.60444700 | -3.25838200 | 0.00084600  |
| H | -3.15144100 | -4.73295400 | -0.87982700 |
| H | -3.15115400 | -4.73423800 | 0.87929700  |
| H | -1.26417500 | -6.37462300 | -0.87997500 |
| H | 0.26094500  | -6.61341900 | 0.00025100  |
| H | -1.26455300 | -6.37473000 | 0.87986400  |

**Cartesian coordinates and energies of all calculated dimers at the optimally tuned  $\omega$ B97/6-311G\*\* level.**

| <b>BTD-BTD</b> | <b><math>E_{el}</math> (tuned <math>\omega</math>B97/6-311G**) = -1476.53989483 a.u.</b> |             |             |
|----------------|------------------------------------------------------------------------------------------|-------------|-------------|
| C              | 1.74126100                                                                               | -2.60647200 | 0.76584700  |
| C              | 0.57243400                                                                               | -1.76630200 | 0.73909300  |
| C              | 0.61033400                                                                               | -0.42948700 | 0.37657100  |
| C              | 1.91254600                                                                               | 0.09654300  | 0.00740500  |
| C              | 3.08716000                                                                               | -0.76039700 | 0.02836400  |
| C              | 2.98640000                                                                               | -2.13591400 | 0.42239000  |
| N              | 2.18603000                                                                               | 1.35499600  | -0.39546400 |
| S              | 3.79346100                                                                               | 1.40357200  | -0.70698000 |
| N              | 4.21992400                                                                               | -0.13655200 | -0.35429300 |
| C              | -1.74124300                                                                              | 2.60645800  | 0.76593100  |
| C              | -0.57241700                                                                              | 1.76628800  | 0.73913600  |

|   |             |             |             |
|---|-------------|-------------|-------------|
| C | -1.91254600 | -0.09654400 | 0.00744500  |
| C | -3.08716000 | 0.76039600  | 0.02844500  |
| C | -2.98639000 | 2.13590700  | 0.42249300  |
| N | -2.18604000 | -1.35498900 | -0.39544000 |
| S | -3.79347700 | -1.40355800 | -0.70692300 |
| N | -4.21993200 | 0.13655900  | -0.35419600 |
| C | -0.61032500 | 0.42947900  | 0.37659200  |
| H | 1.61924200  | -3.64876900 | 1.07093000  |
| H | -0.38541800 | -2.21019200 | 1.01298300  |
| H | 3.88024600  | -2.76148500 | 0.43592200  |
| H | -1.61921600 | 3.64875000  | 1.07103000  |
| H | 0.38544200  | 2.21017200  | 1.01301200  |
| H | -3.88023500 | 2.76147800  | 0.43605700  |

**EDOT-BTD**

$E_{el}$  (tuned  $\omega_{B97/6-311G^{**}}$ ) = -1518.58894974 a.u.

|   |             |             |             |
|---|-------------|-------------|-------------|
| C | 0.60643600  | -0.27141400 | -0.09526900 |
| C | 1.92250900  | 0.15476100  | 0.01803300  |
| C | 2.88081700  | -0.91591200 | -0.02923100 |
| C | 2.28682900  | -2.14080500 | -0.17604700 |
| S | 0.57002200  | -2.01417400 | -0.24247800 |
| O | 2.30884200  | 1.46878600  | 0.15774400  |
| C | 3.66698400  | 1.58651700  | 0.63066700  |
| C | 4.58913500  | 0.65928900  | -0.15298100 |
| O | 4.23797500  | -0.71530300 | 0.08132700  |
| C | -1.72461300 | 2.77722400  | -0.28763500 |
| C | -0.55160400 | 1.94377500  | -0.27506700 |
| C | -0.60635500 | 0.56763500  | -0.12338100 |
| C | -1.93732200 | 0.00315600  | 0.00908400  |
| C | -3.11405600 | 0.85010700  | -0.00944400 |
| C | -2.99157400 | 2.27045500  | -0.15861900 |
| N | -2.23154500 | -1.29871500 | 0.15174100  |
| S | -3.85706400 | -1.40570900 | 0.25110100  |
| N | -4.26482600 | 0.16829100  | 0.12124100  |
| H | 2.77850100  | -3.10761600 | -0.23132600 |
| H | 3.94623300  | 2.63839400  | 0.48729000  |
| H | 3.70282100  | 1.33783500  | 1.70525500  |
| H | 5.63006800  | 0.77045100  | 0.17802300  |
| H | 4.52105100  | 0.88421000  | -1.23223100 |
| H | -1.58266500 | 3.85354700  | -0.40941600 |
| H | 0.41891900  | 2.42317800  | -0.39015200 |
| H | -3.88531200 | 2.89449900  | -0.16949800 |

**EDOT-EDOT**

$E_{el}$  (tuned  $\omega_{B97/6-311G^{**}}$ ) = -1560.77814074 a.u.

|   |            |             |             |
|---|------------|-------------|-------------|
| C | 0.61746600 | 0.39086900  | 0.00446500  |
| C | 1.91923600 | -0.08000100 | 0.00899000  |
| C | 2.91152200 | 0.96234900  | -0.00522700 |
| C | 2.35539200 | 2.21709400  | -0.02116700 |
| S | 0.62346000 | 2.14282300  | -0.01828700 |
| O | 2.24446800 | -1.41969200 | 0.03732400  |
| C | 3.61994500 | -1.63797700 | -0.34815200 |
| C | 4.54250600 | -0.65954800 | 0.37807200  |

|   |             |             |             |
|---|-------------|-------------|-------------|
| O | 4.26506700  | 0.70061400  | -0.01852500 |
| C | -1.91923600 | 0.07999900  | 0.00903800  |
| C | -2.91152200 | -0.96234900 | -0.00516400 |
| C | -2.35539300 | -2.21709400 | -0.02116300 |
| S | -0.62346000 | -2.14281900 | -0.01858100 |
| O | -2.24446700 | 1.41968900  | 0.03745900  |
| C | -3.61996400 | 1.63799000  | -0.34793700 |
| C | -4.54248500 | 0.65953300  | 0.37830100  |
| O | -4.26507000 | -0.70061500 | -0.01836200 |
| C | -0.61746600 | -0.39087000 | 0.00444100  |
| H | 2.87172400  | 3.17274300  | -0.03233800 |
| H | 3.85012700  | -2.67620100 | -0.07247000 |
| H | 3.72018100  | -1.51434200 | -1.44148500 |
| H | 5.59335600  | -0.84371300 | 0.11454400  |
| H | 4.41403300  | -0.76179300 | 1.47109700  |
| H | -2.87172500 | -3.17274300 | -0.03231400 |
| H | -3.85013000 | 2.67620400  | -0.07219900 |
| H | -3.72026000 | 1.51440000  | -1.44126800 |
| H | -5.59334900 | 0.84370900  | 0.11484000  |
| H | -4.41394900 | 0.76173600  | 1.47132200  |

**EDOT-TP**

$E_{el}$  (tuned  $\omega_{B97/6-311G^{**}}$ ) = -1597.32984420 a.u.

|   |             |             |             |
|---|-------------|-------------|-------------|
| C | 1.02611100  | 0.32746200  | 0.00116700  |
| C | 2.37408400  | -0.00025700 | -0.00651200 |
| C | 3.24789300  | 1.14210200  | -0.01878800 |
| C | 2.55489100  | 2.32791000  | -0.02500900 |
| S | 0.83885600  | 2.07122800  | -0.01449600 |
| O | 2.83834000  | -1.29747200 | 0.00895100  |
| C | 4.23524300  | -1.36824600 | -0.36610800 |
| C | 5.04366600  | -0.29445000 | 0.36273300  |
| O | 4.62270600  | 1.02773500  | -0.03822000 |
| C | -0.10905000 | -0.58837700 | 0.01188500  |
| C | -1.47931300 | -0.27851100 | 0.00850300  |
| C | -2.33171100 | -1.44393900 | 0.01559200  |
| C | -1.60716000 | -2.62982700 | 0.02707800  |
| S | 0.08212100  | -2.31571500 | 0.02766400  |
| N | -1.99832300 | 0.99891400  | -0.00066900 |
| C | -3.31228500 | 1.08732300  | -0.00329500 |
| C | -4.18275100 | -0.10325700 | 0.00301800  |
| N | -3.71187100 | -1.33240000 | 0.01228500  |
| C | -5.68924200 | 0.06509400  | -0.00085000 |
| C | -3.92257300 | 2.47406200  | -0.01298500 |
| H | 2.96504300  | 3.33419100  | -0.03395600 |
| H | 4.57164600  | -2.37579100 | -0.08543700 |
| H | 4.32702400  | -1.23761700 | -1.45918100 |
| H | 6.10918400  | -0.36553700 | 0.10300100  |
| H | 4.92320600  | -0.40822200 | 1.45574300  |
| H | -1.98519800 | -3.64887800 | 0.03527800  |
| H | -6.02767100 | 0.61899400  | -0.89226700 |
| H | -6.15728400 | -0.92736400 | 0.00428000  |
| H | -6.03105600 | 0.62965700  | 0.88255200  |
| H | -3.11789500 | 3.22015700  | -0.01620800 |
| H | -4.55663000 | 2.62546400  | -0.90244300 |

H -4.55982300 2.63651100 0.87223200

**TP-BTD**

$E_{el} = -1555.23325861$  a.u.

|   |             |             |             |
|---|-------------|-------------|-------------|
| C | -1.52432100 | -2.54077300 | -0.00073600 |
| C | -2.29475400 | -1.38093500 | -0.00011200 |
| S | 0.14358000  | -2.17199200 | -0.00102200 |
| C | -1.48679800 | -0.18186700 | 0.00001100  |
| N | -3.67596200 | -1.34365200 | 0.00033900  |
| C | -0.09660300 | -0.44627800 | -0.00050100 |
| N | -2.08454200 | 1.06545100  | 0.00061200  |
| C | -4.21520200 | -0.14156600 | 0.00090000  |
| C | 1.02992300  | 0.51129400  | -0.00072200 |
| C | -3.40366200 | 1.08514800  | 0.00104900  |
| C | -5.72873200 | -0.05373600 | 0.00139500  |
| C | 0.82731600  | 1.88973000  | -0.00142200 |
| C | 2.41907500  | 0.08209600  | -0.00021600 |
| C | -4.08312800 | 2.44012300  | 0.00172400  |
| H | -6.09837100 | 0.48590200  | 0.88936600  |
| H | -6.09891800 | 0.48653900  | -0.88596000 |
| H | -6.14336700 | -1.06983900 | 0.00116000  |
| C | 1.90653900  | 2.83995500  | -0.00160800 |
| H | -0.19835400 | 2.25995600  | -0.00176400 |
| C | 3.50416900  | 1.05273800  | -0.00042900 |
| N | 2.85321200  | -1.19411800 | 0.00045600  |
| H | -3.32041800 | 3.22932200  | 0.00188000  |
| H | -4.72686800 | 2.56329500  | -0.88525100 |
| H | -4.72650700 | 2.56259600  | 0.88905800  |
| C | 3.23031500  | 2.45993300  | -0.00113800 |
| H | 1.64914700  | 3.90267100  | -0.00216500 |
| N | 4.73183100  | 0.49095700  | 0.00009200  |
| S | 4.49417600  | -1.13111300 | 0.00078600  |
| H | 4.05452300  | 3.17491100  | -0.00129300 |
| H | -1.87156000 | -3.57130200 | -0.00092800 |

**TP-TP**

$E_{el}$  (tuned  $\omega_{B97/6-311G^{**}}$ ) = -1633.91913157 a.u.

|   |             |            |             |
|---|-------------|------------|-------------|
| C | 0.01159900  | 0.72862200 | -0.00001000 |
| C | -1.08128700 | 1.61687700 | 0.00007100  |
| C | -0.69170800 | 3.00815600 | -0.00013100 |
| C | 0.69170800  | 3.16711100 | -0.00039700 |
| S | 1.49268500  | 1.64527200 | 0.00014100  |
| N | -2.40605300 | 1.23590900 | 0.00019400  |
| C | -3.28946800 | 2.21764100 | 0.00015400  |
| C | -2.89105900 | 3.63688100 | -0.00002900 |
| N | -1.62995400 | 4.02523600 | -0.00018000 |
| C | -3.95256300 | 4.72069500 | -0.00017700 |
| C | -4.75761200 | 1.83936600 | 0.00022300  |
| H | 1.25996100  | 4.09428000 | -0.00065200 |
| H | -4.60291100 | 4.64465000 | 0.88753100  |
| H | -3.45944700 | 5.70126600 | -0.00034600 |
| H | -4.60296400 | 4.64437100 | -0.88782500 |
| H | -4.84859600 | 0.74551400 | 0.00031700  |

|   |             |             |             |
|---|-------------|-------------|-------------|
| H | -5.27378800 | 2.24308600  | 0.88757500  |
| H | -5.27384400 | 2.24293900  | -0.88716400 |
| C | -0.01159900 | -0.72862200 | -0.00001000 |
| C | 1.08128700  | -1.61687700 | 0.00007100  |
| S | -1.49268500 | -1.64527200 | 0.00014100  |
| C | 0.69170800  | -3.00815600 | -0.00013100 |
| N | 2.40605300  | -1.23590900 | 0.00019400  |
| C | -0.69170800 | -3.16711100 | -0.00039700 |
| N | 1.62995400  | -4.02523600 | -0.00018000 |
| C | 3.28946800  | -2.21764100 | 0.00015400  |
| H | -1.25996100 | -4.09428000 | -0.00065200 |
| C | 2.89105900  | -3.63688100 | -0.00002900 |
| C | 4.75761200  | -1.83936600 | 0.00022300  |
| C | 3.95256300  | -4.72069500 | -0.00017700 |
| H | 4.84859600  | -0.74551400 | 0.00031700  |
| H | 5.27378800  | -2.24308600 | 0.88757500  |
| H | 5.27384400  | -2.24293900 | -0.88716400 |
| H | 4.60291100  | -4.64465000 | 0.88753100  |
| H | 3.45944700  | -5.70126600 | -0.00034600 |
| H | 4.60296400  | -4.64437100 | -0.88782500 |

## References

1. Institute of Chemical Sciences and Engineering. Tools for NMR spectroscopists. <http://www.nmrdb.org/simulator/index.shtml?v=v2.34.1> (accessed April 22, 2016).
2. Castillo, A. M.; Patiny, L.; Wist, J. Fast and accurate algorithm for the simulation of NMR for large spin systems. *J. Mag. Res.* **2011**, *209*, 123-130. [10.1016/j.jmr.2010.12.008]
